# Supplementary figures and images for: Dynamical Analysis of Biological Signals with the 0–1 Test: A Case Study of the PhotoPlethysmoGraphic (PPG) Signal
Source: MDPI journal article supplement (doi:10.3390/app11146508), 2021-07-15

# quasi-periodic signal behavior

$q_c(n)$

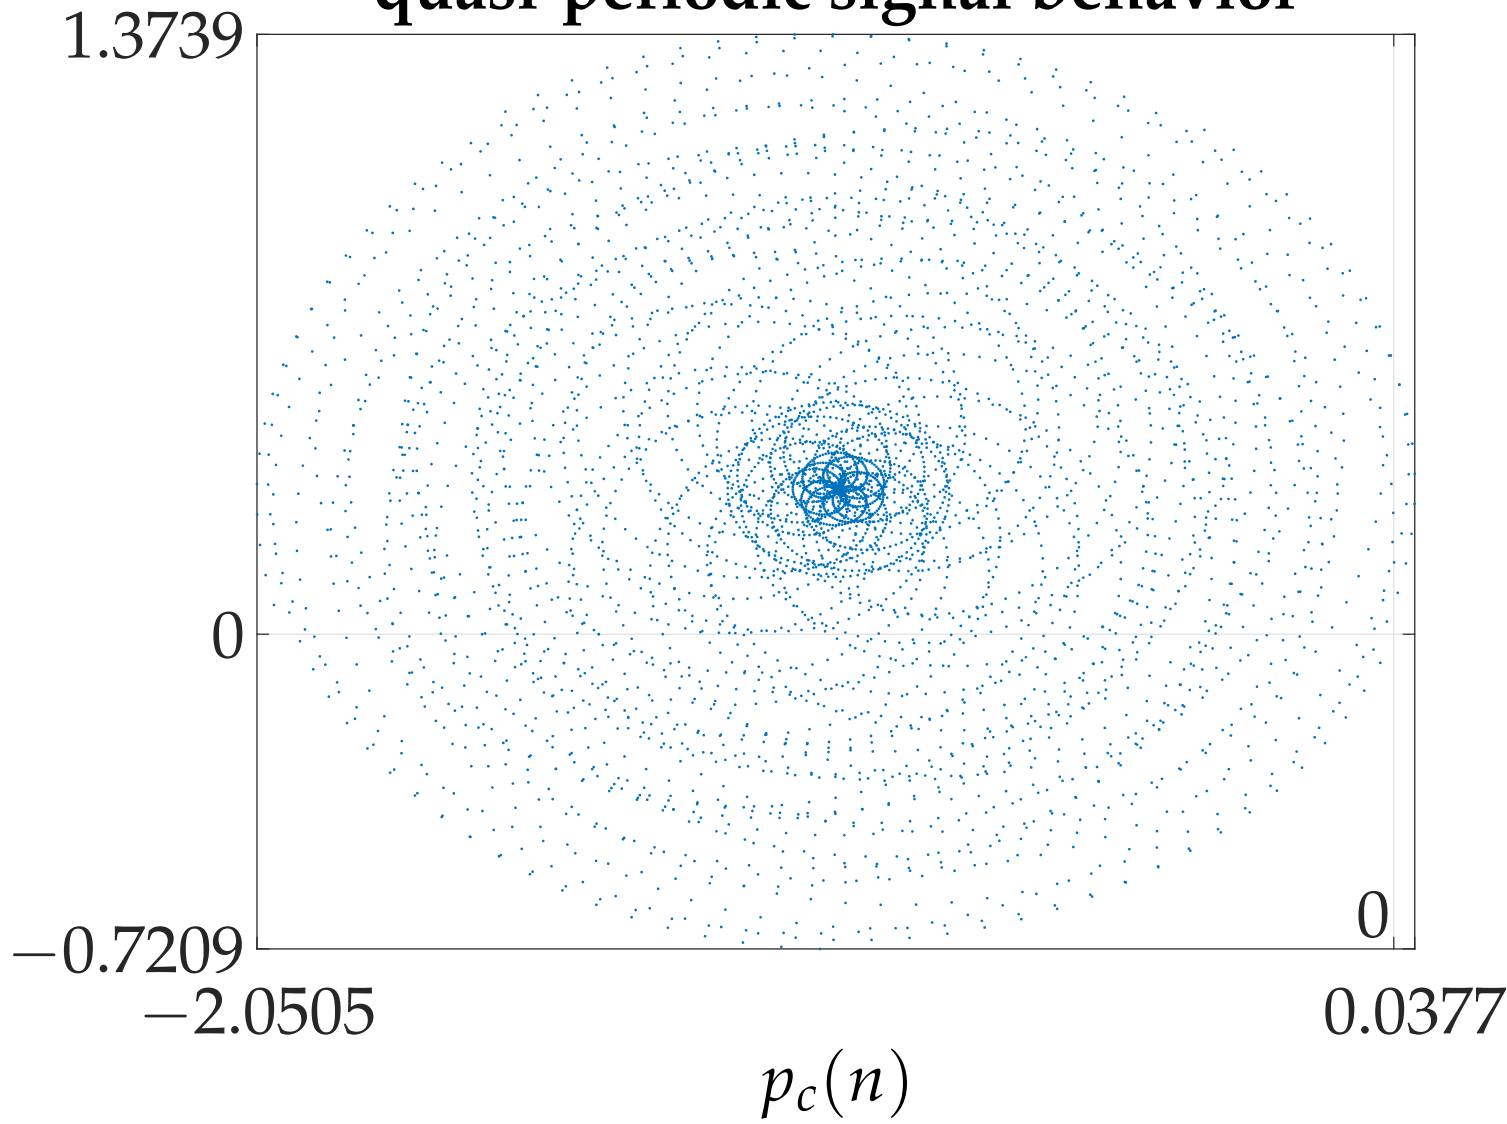

Supplement: s1 [file s1]

# periodic signal behavior

$q_c(n)$

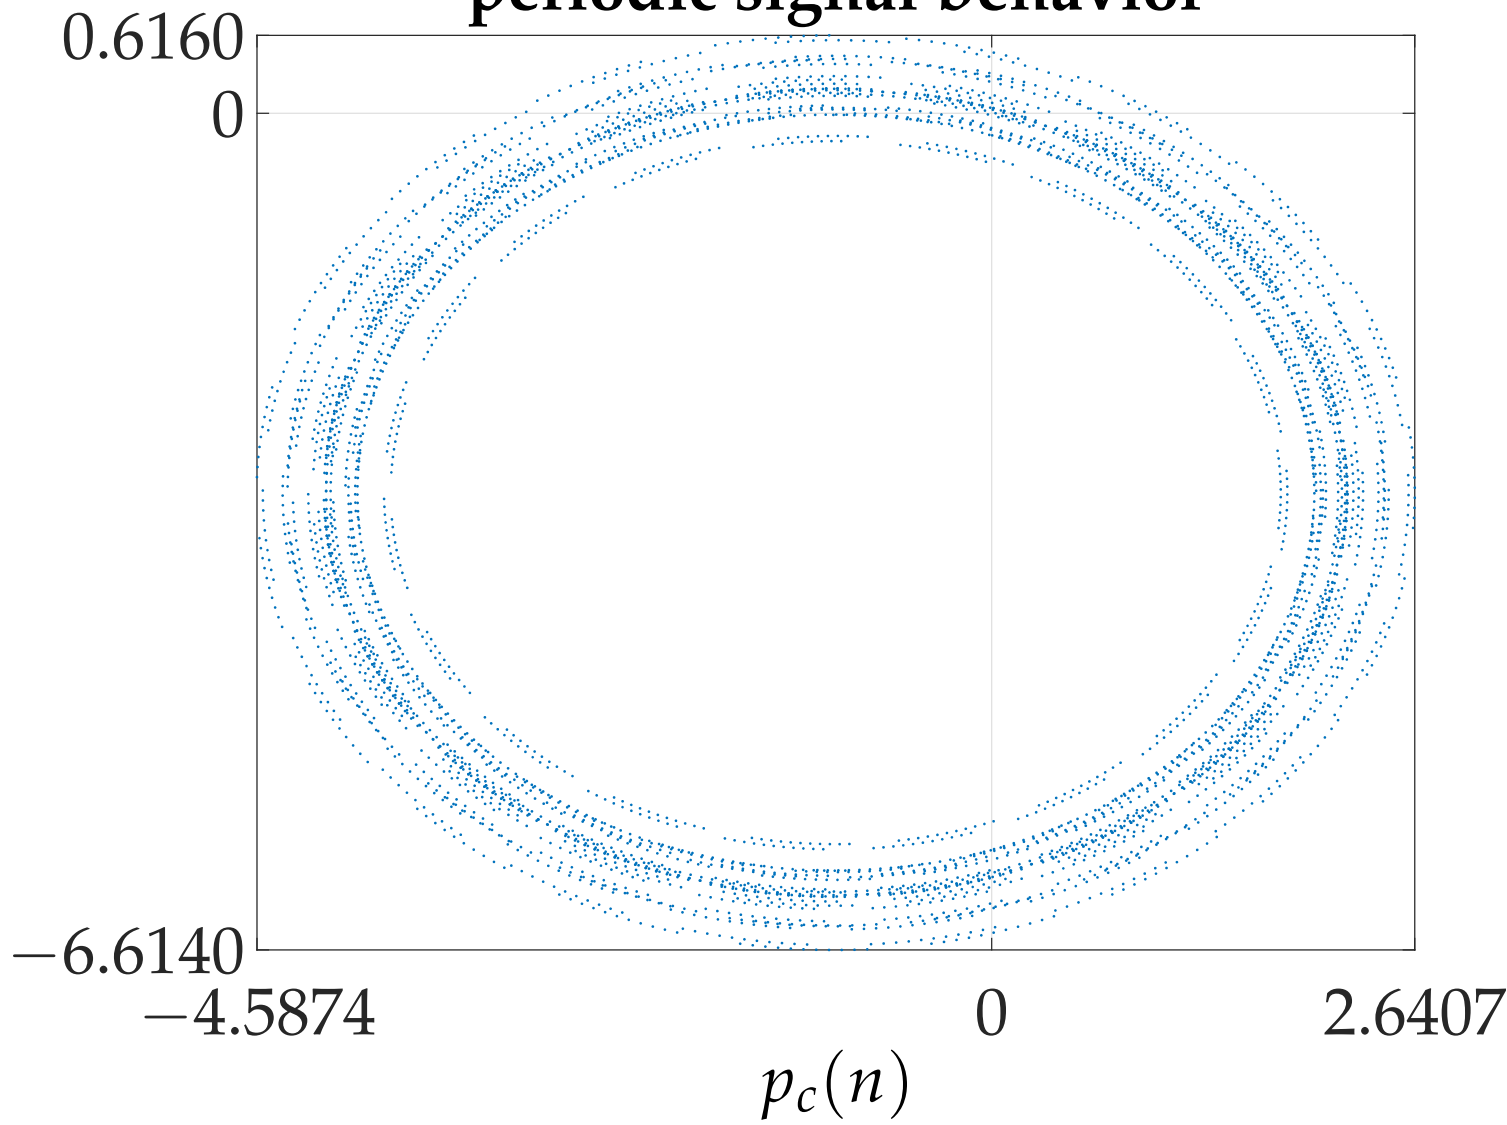

Supplement: s1 [file s1]

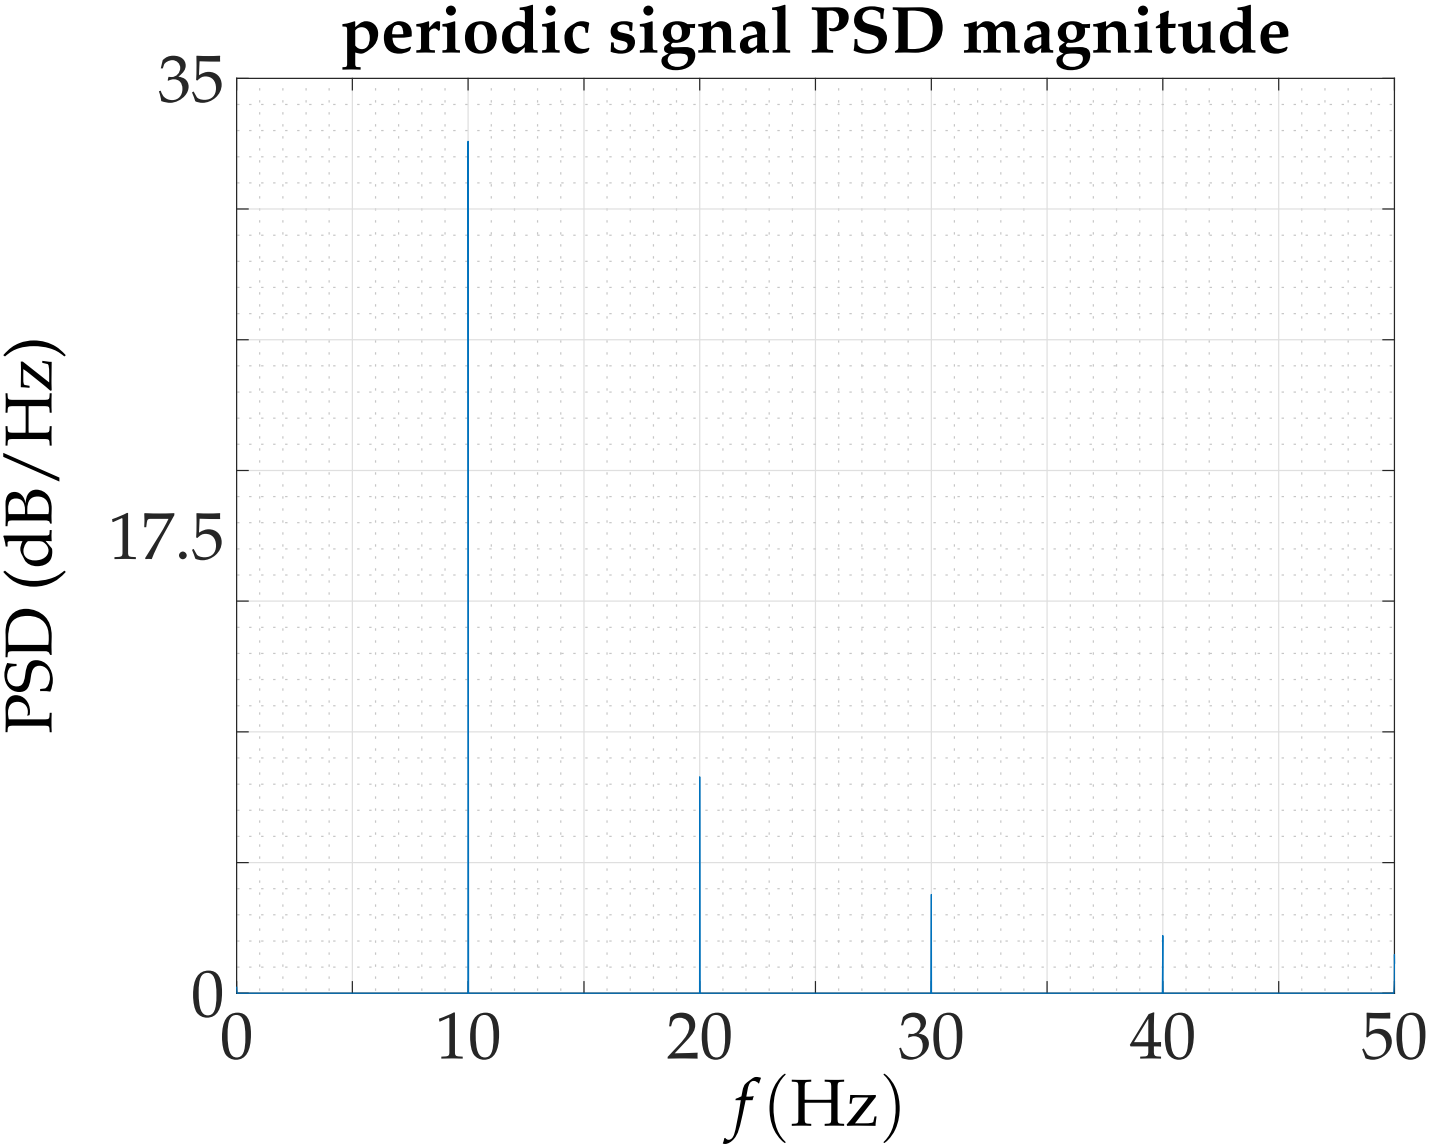

Supplement: s1 [file s1]

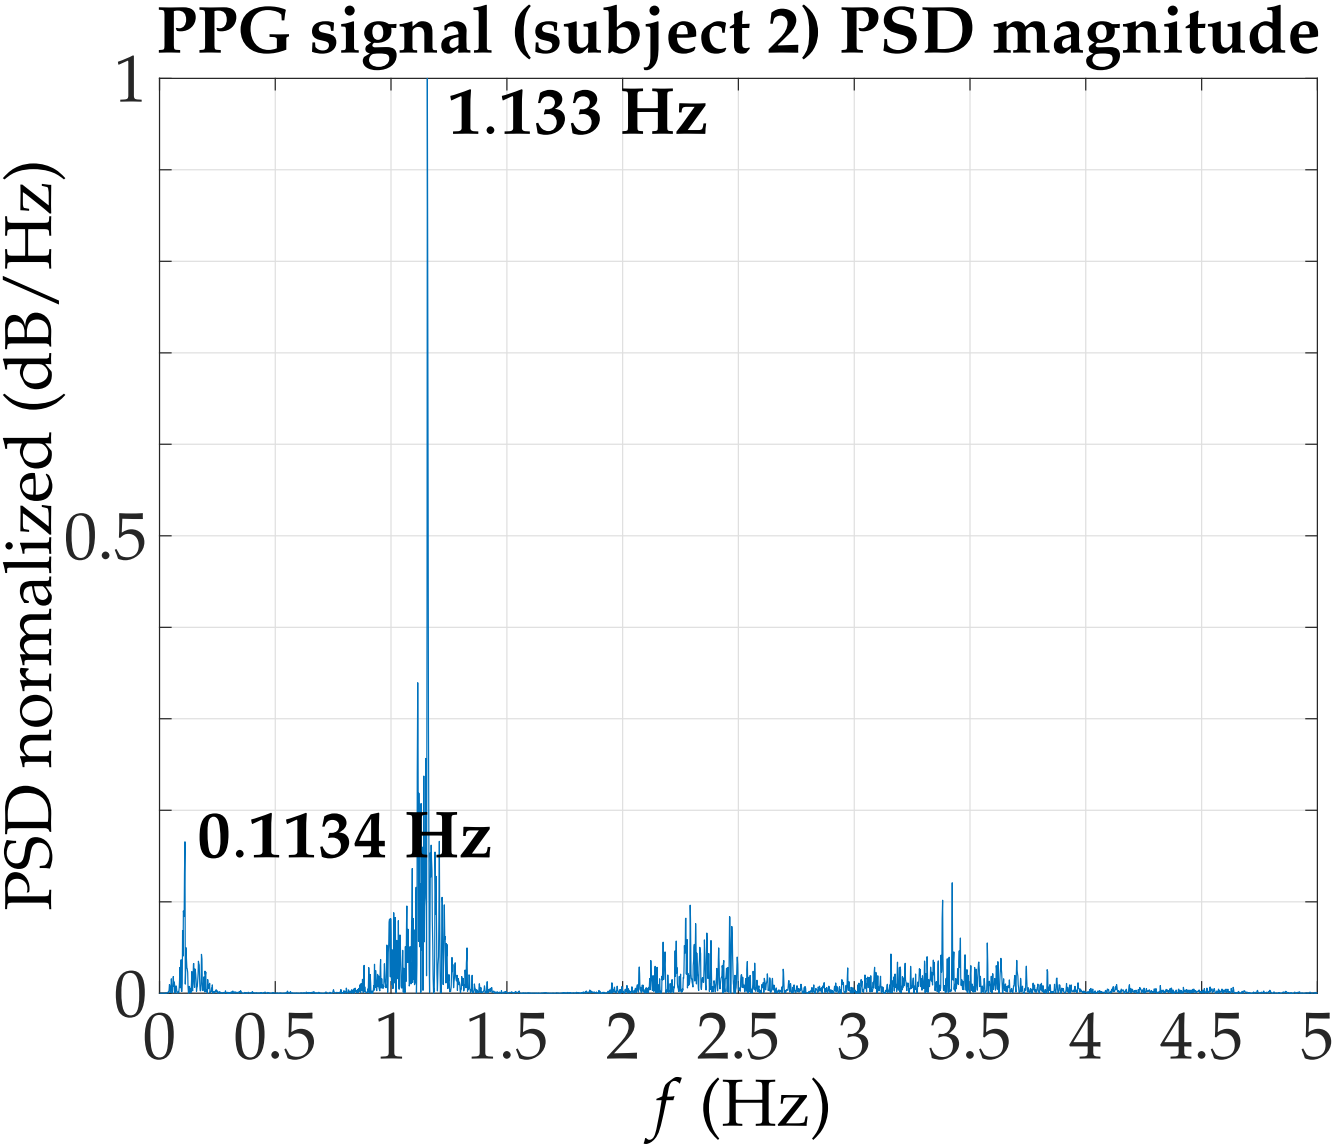

Supplement: s1 [file s1]

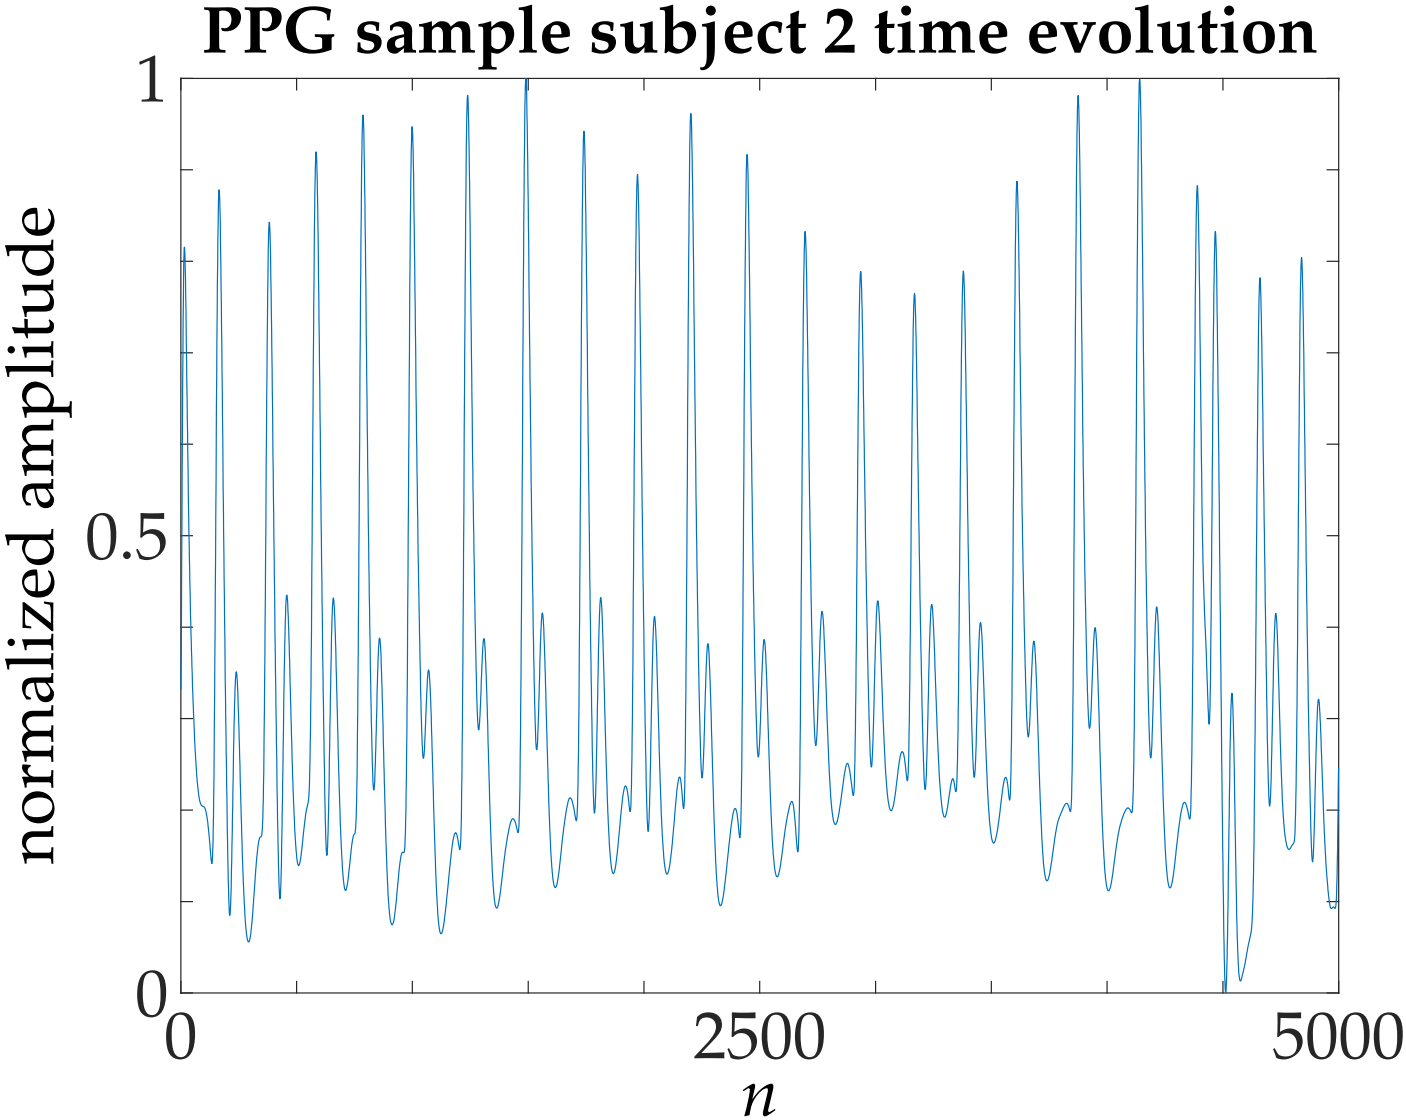

Supplement: s1 [file s1]

# chaotic signal time evolution

normalized amplitude

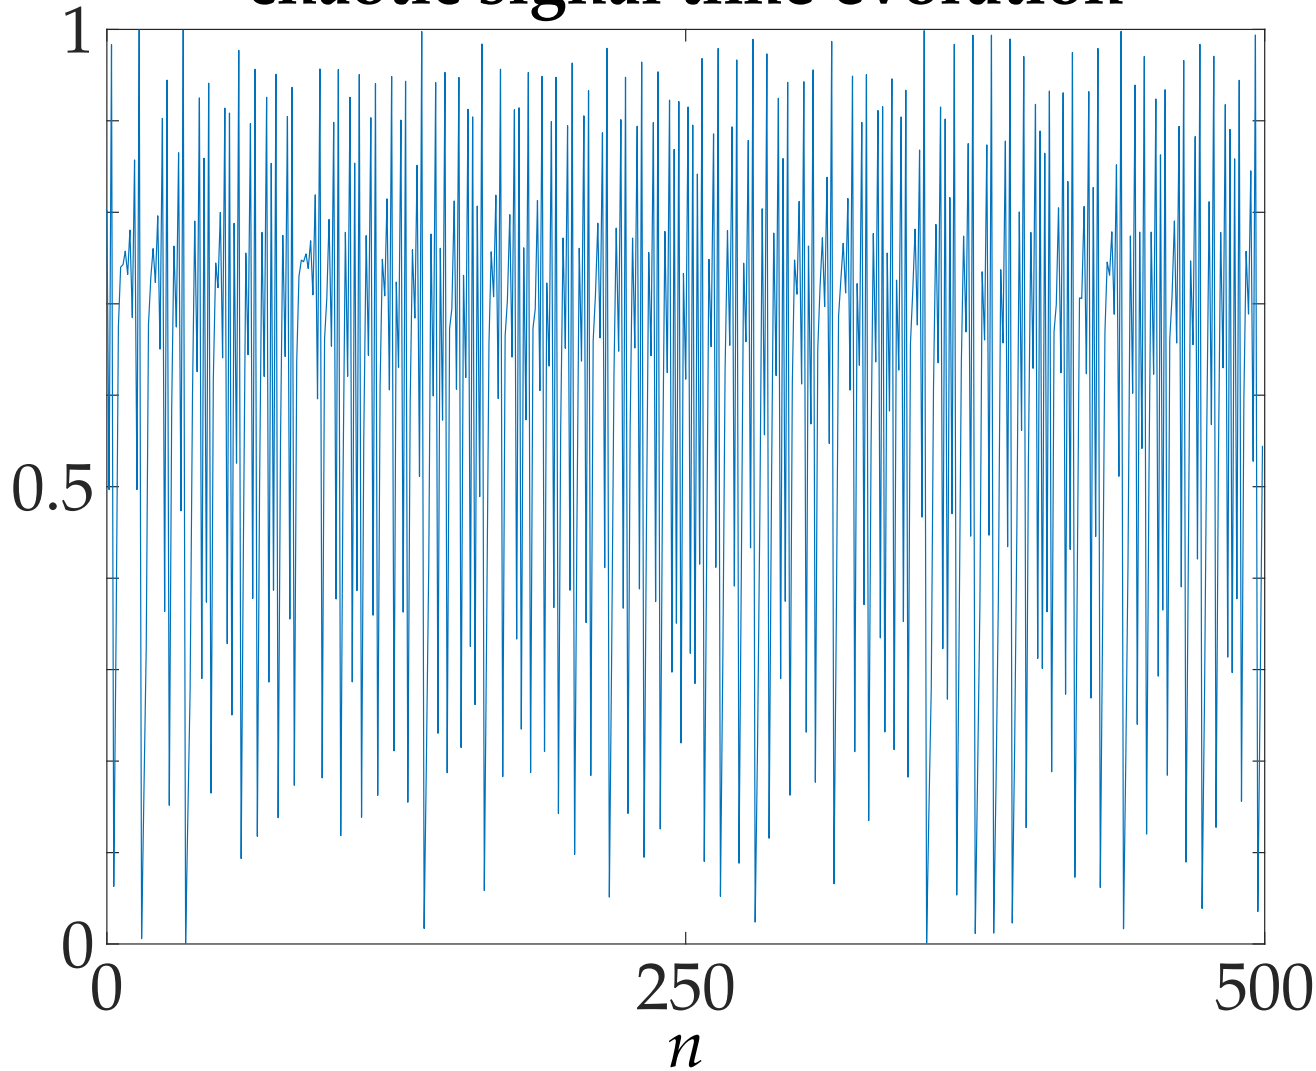

Supplement: s1 [file s1]

# PPG sample subject 5 time evolution

normalized amplitude

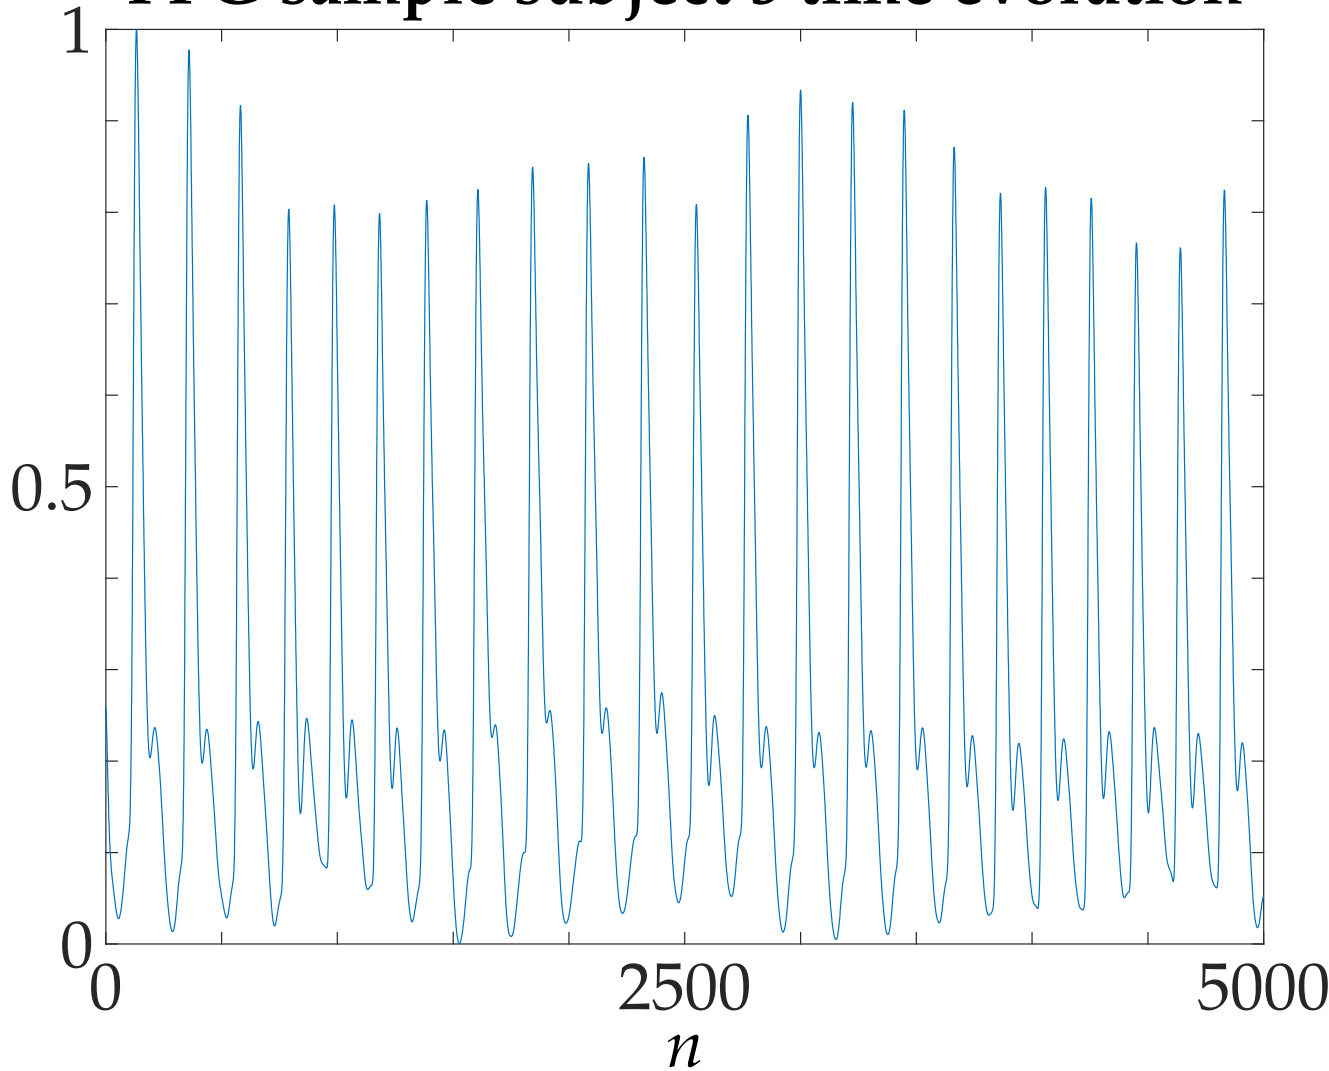

Supplement: s1 [file s1]

# aperiodic signal PSD magnitude

PSD (dB/Hz)

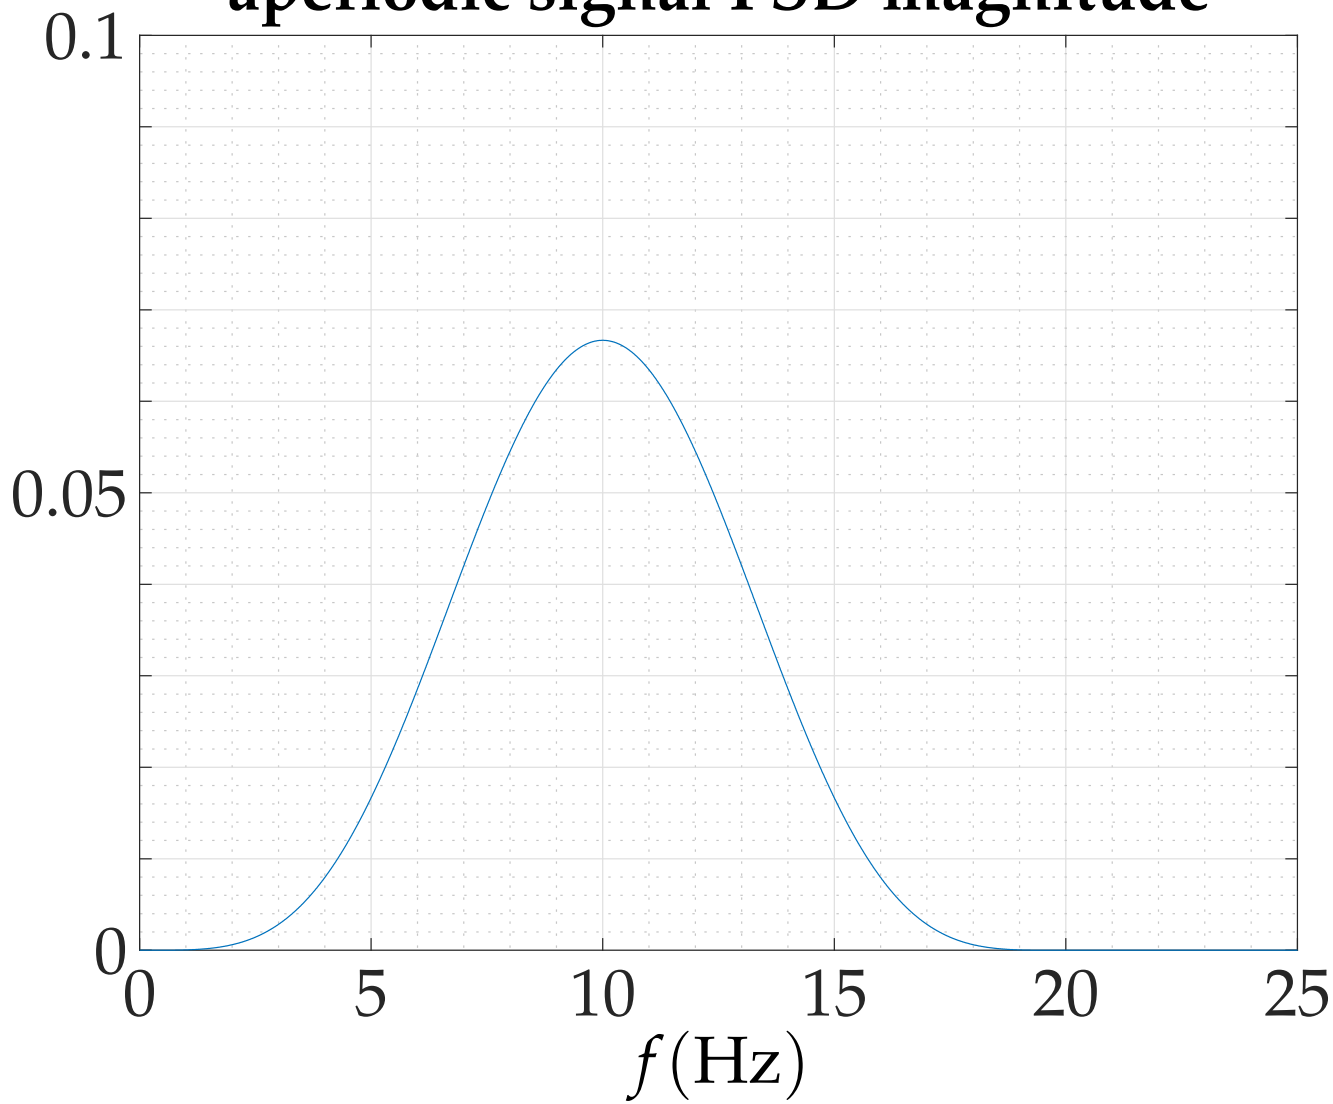

Supplement: s1 [file s1]

# aperiodic signal time evolution

normalized amplitude

0.5

0

1

2500

5000

$n$

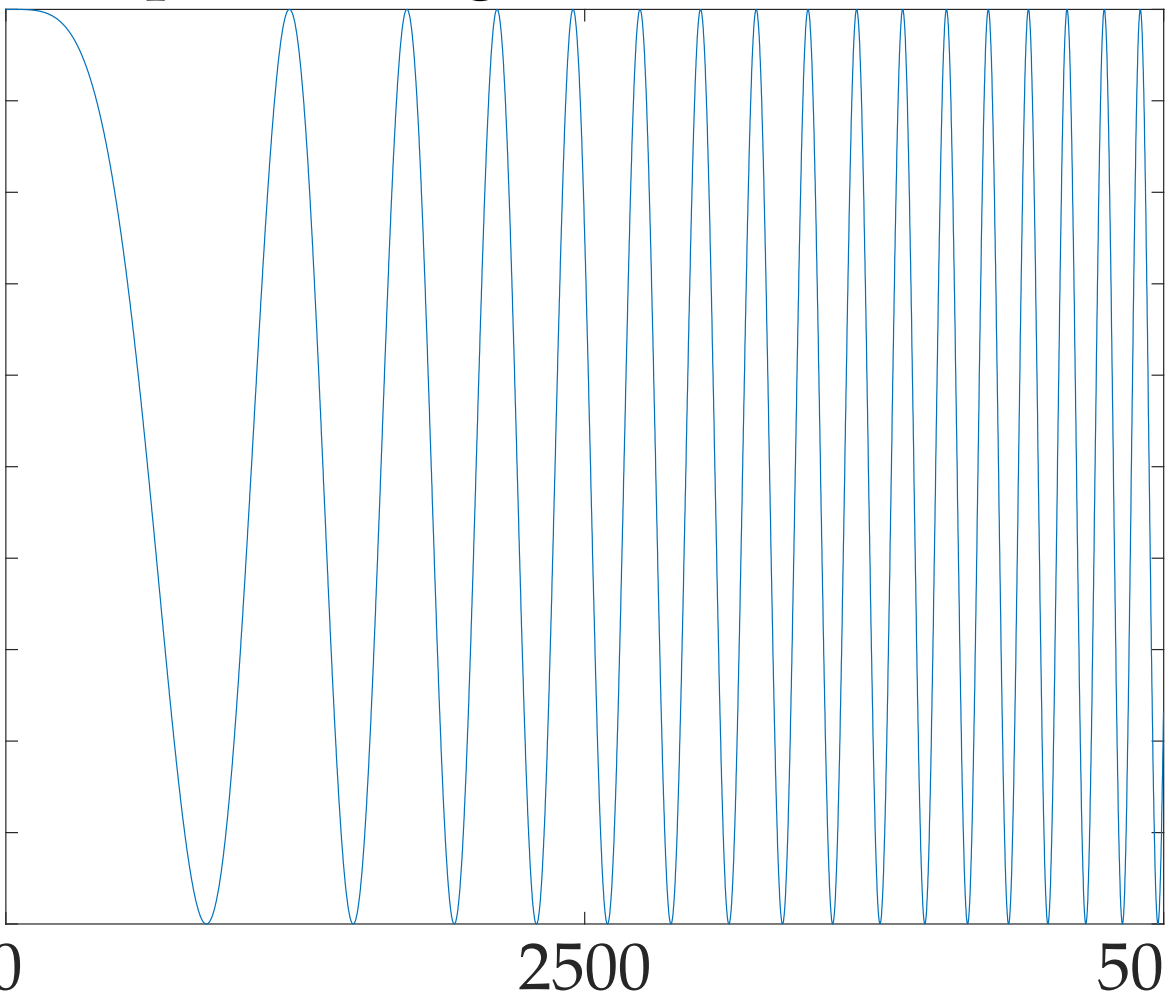

Supplement: s1 [file s1]

# PPG sample subject 4 time evolution

normalized amplitude

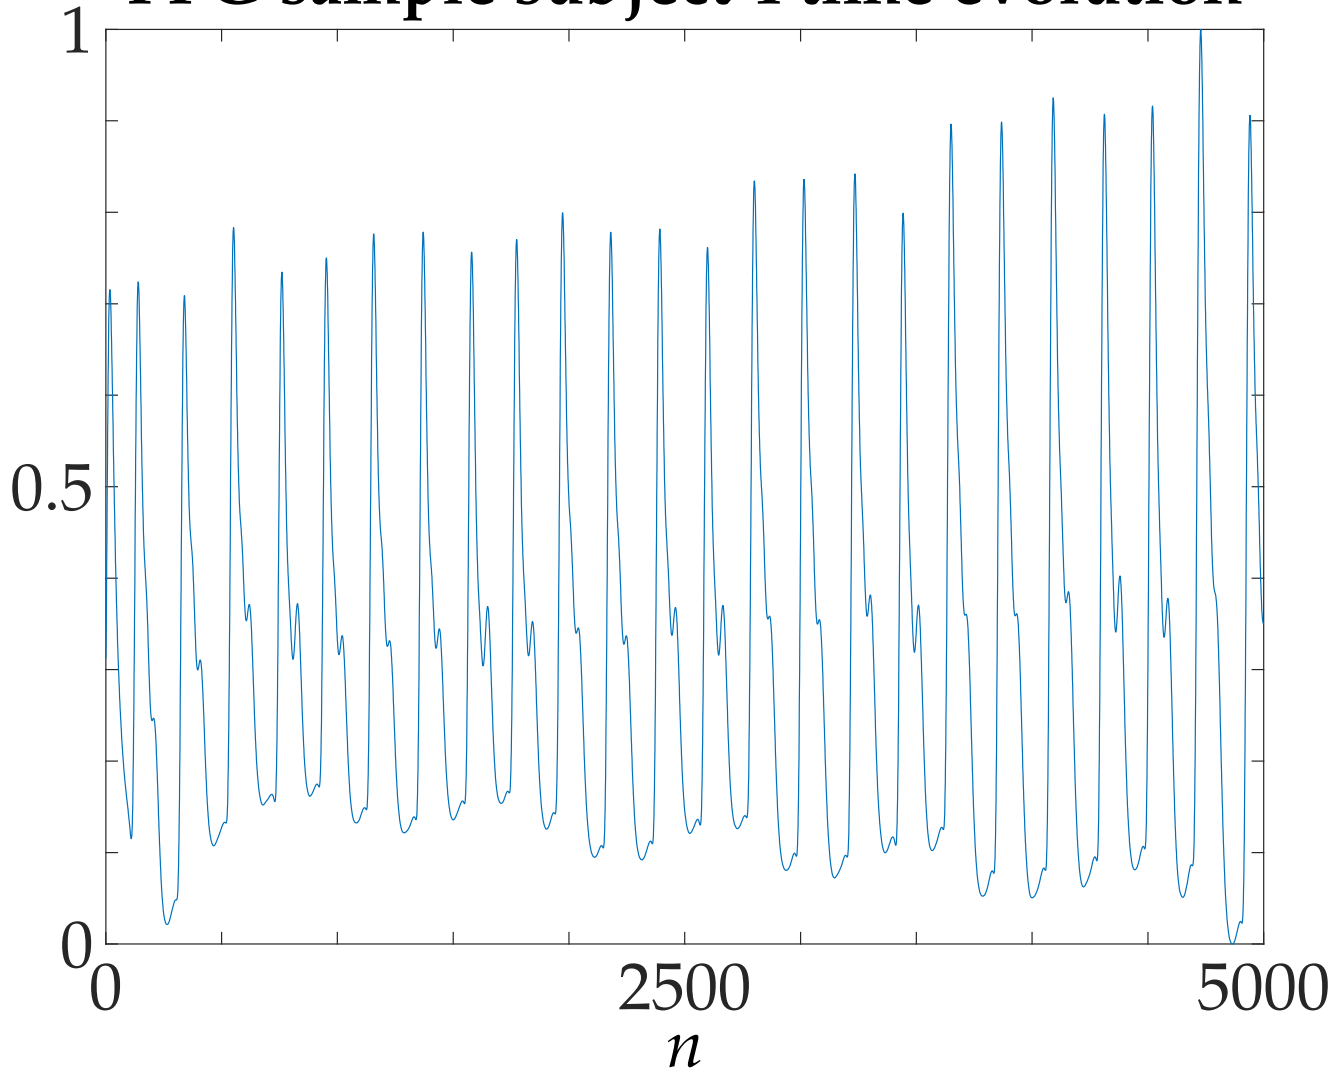

Supplement: s1 [file s1]

# PPG signal behavior subject 5

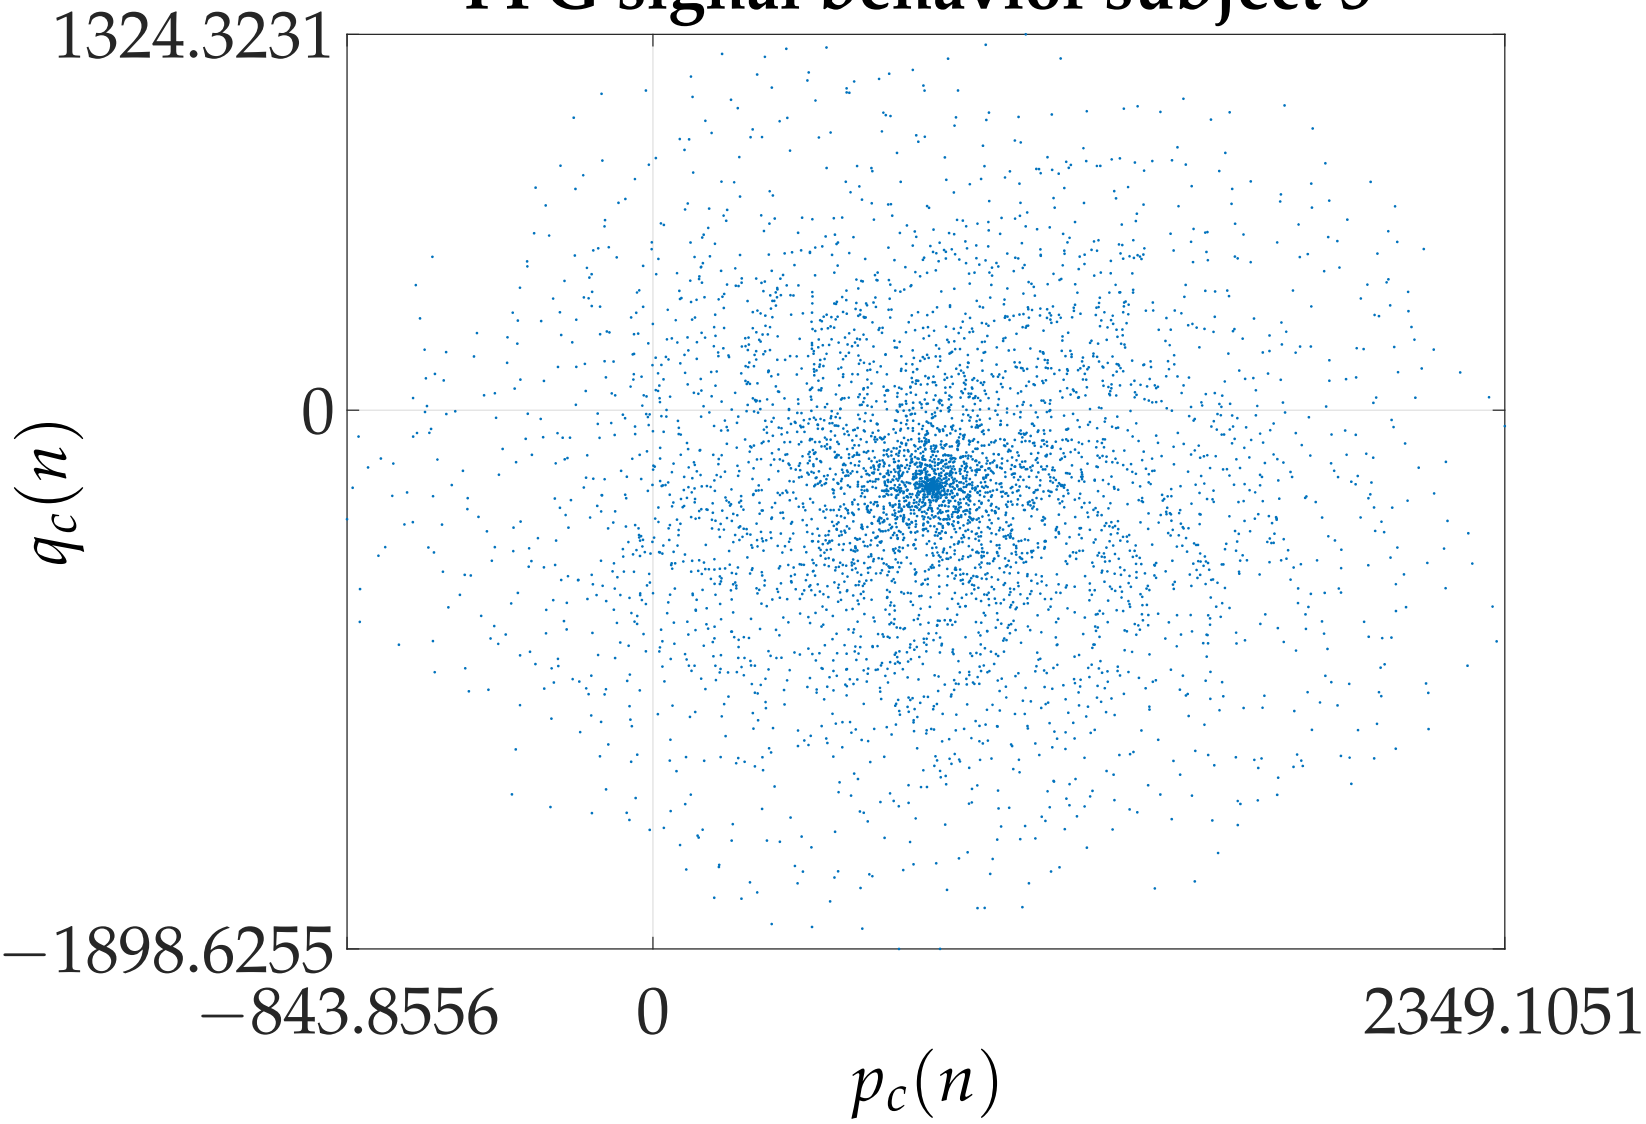

Supplement: s1 [file s1]

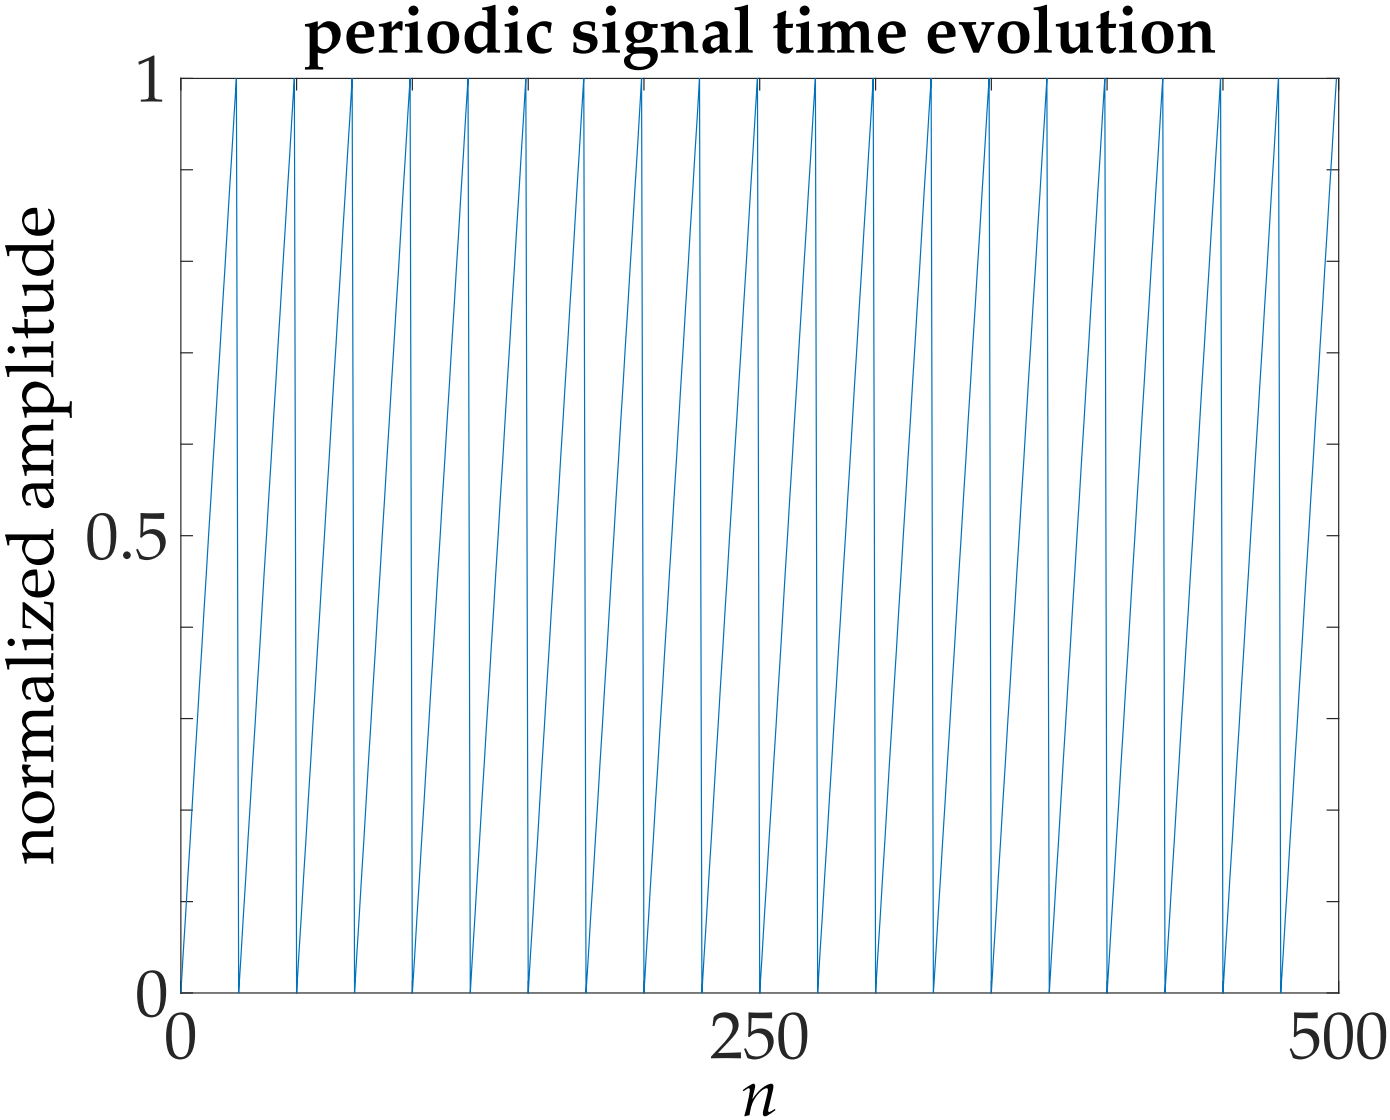

Supplement: s1 [file s1]

# random signal behavior

$q_c(n)$

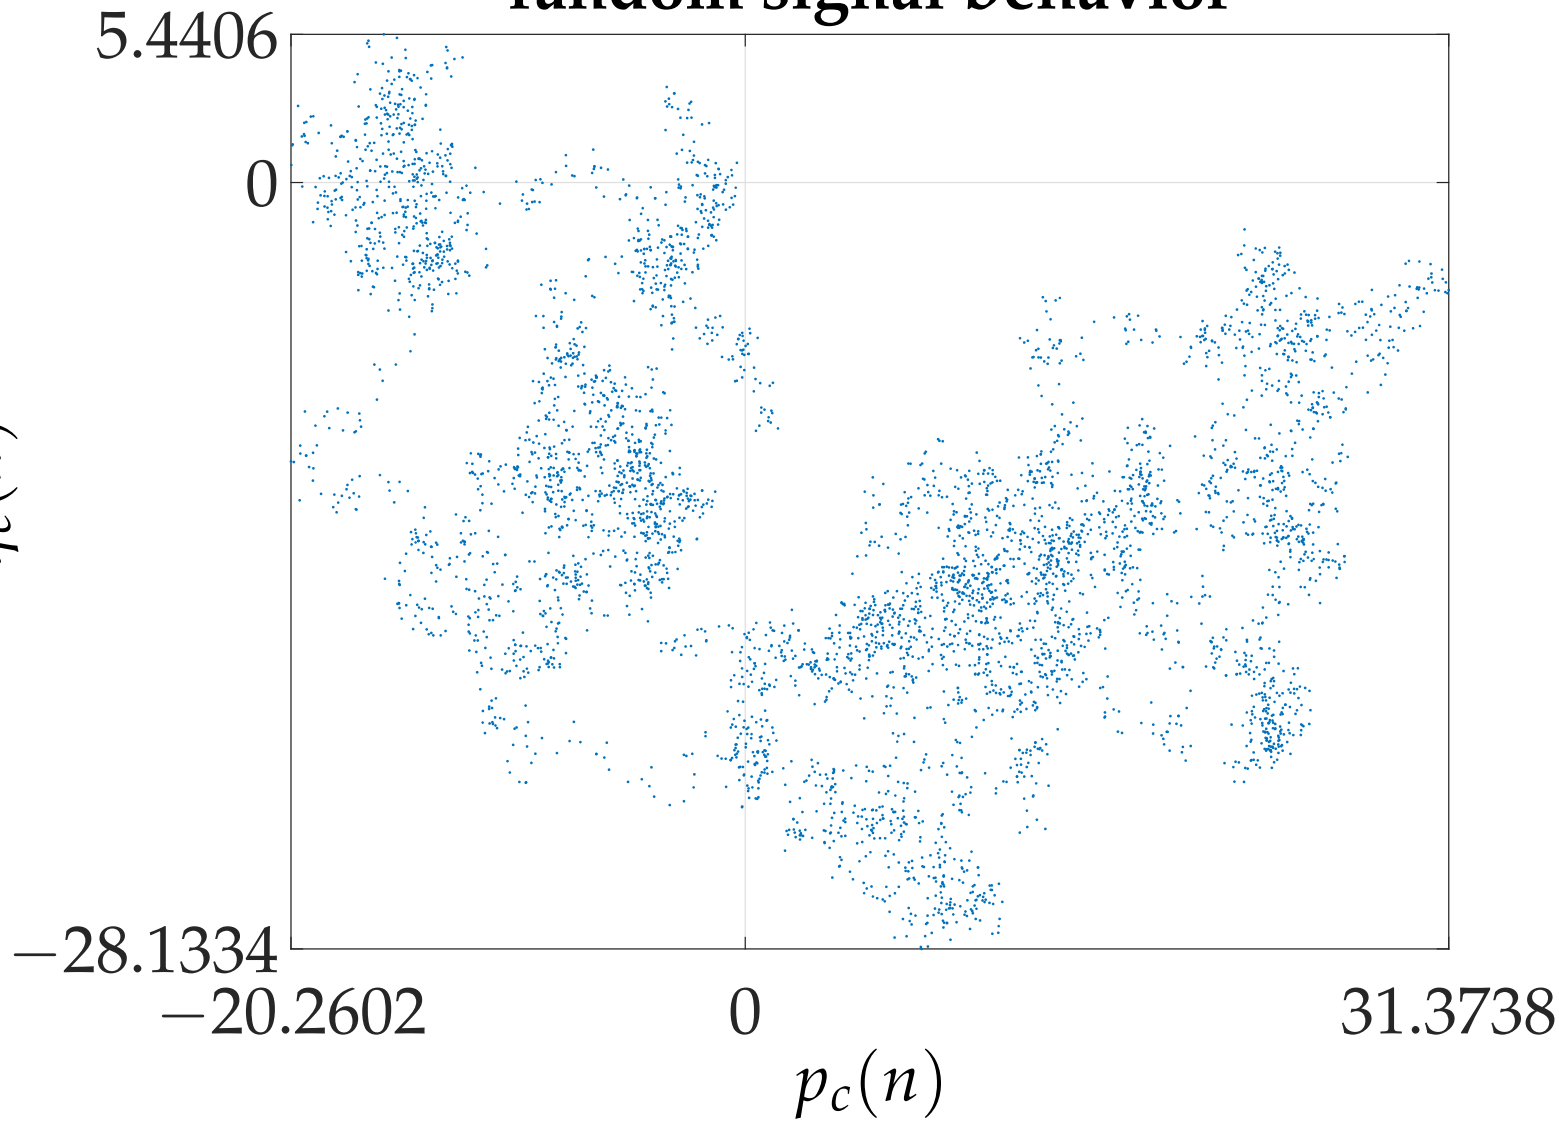

Supplement: s1 [file s1]

# chaotic data diffusion coefficient

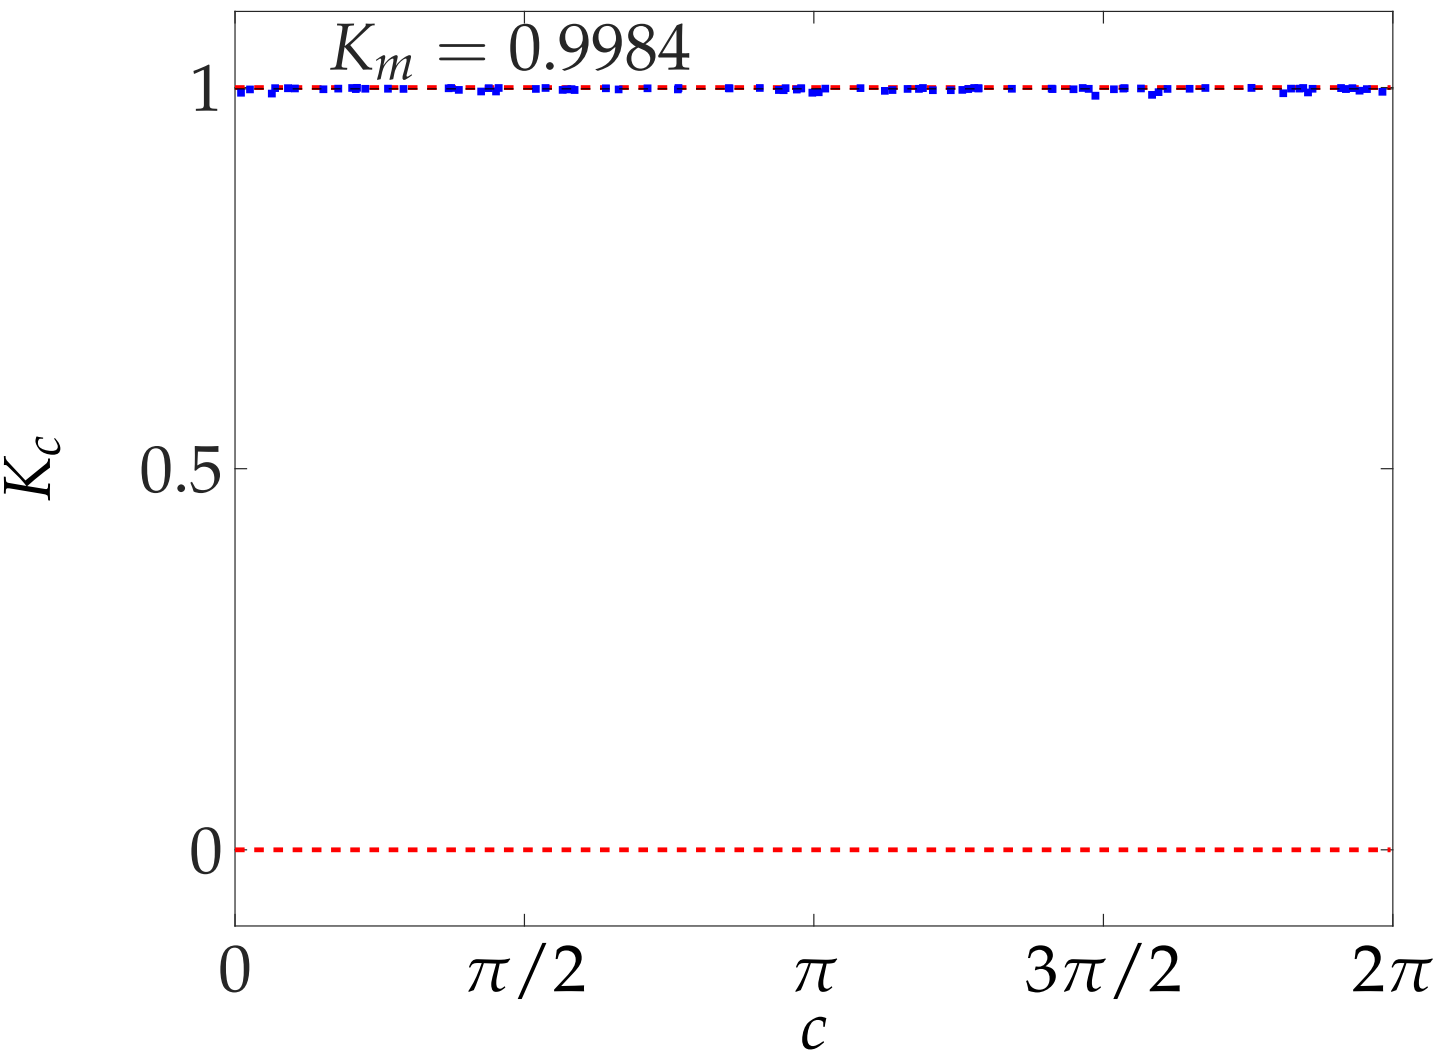

Supplement: s1 [file s1]

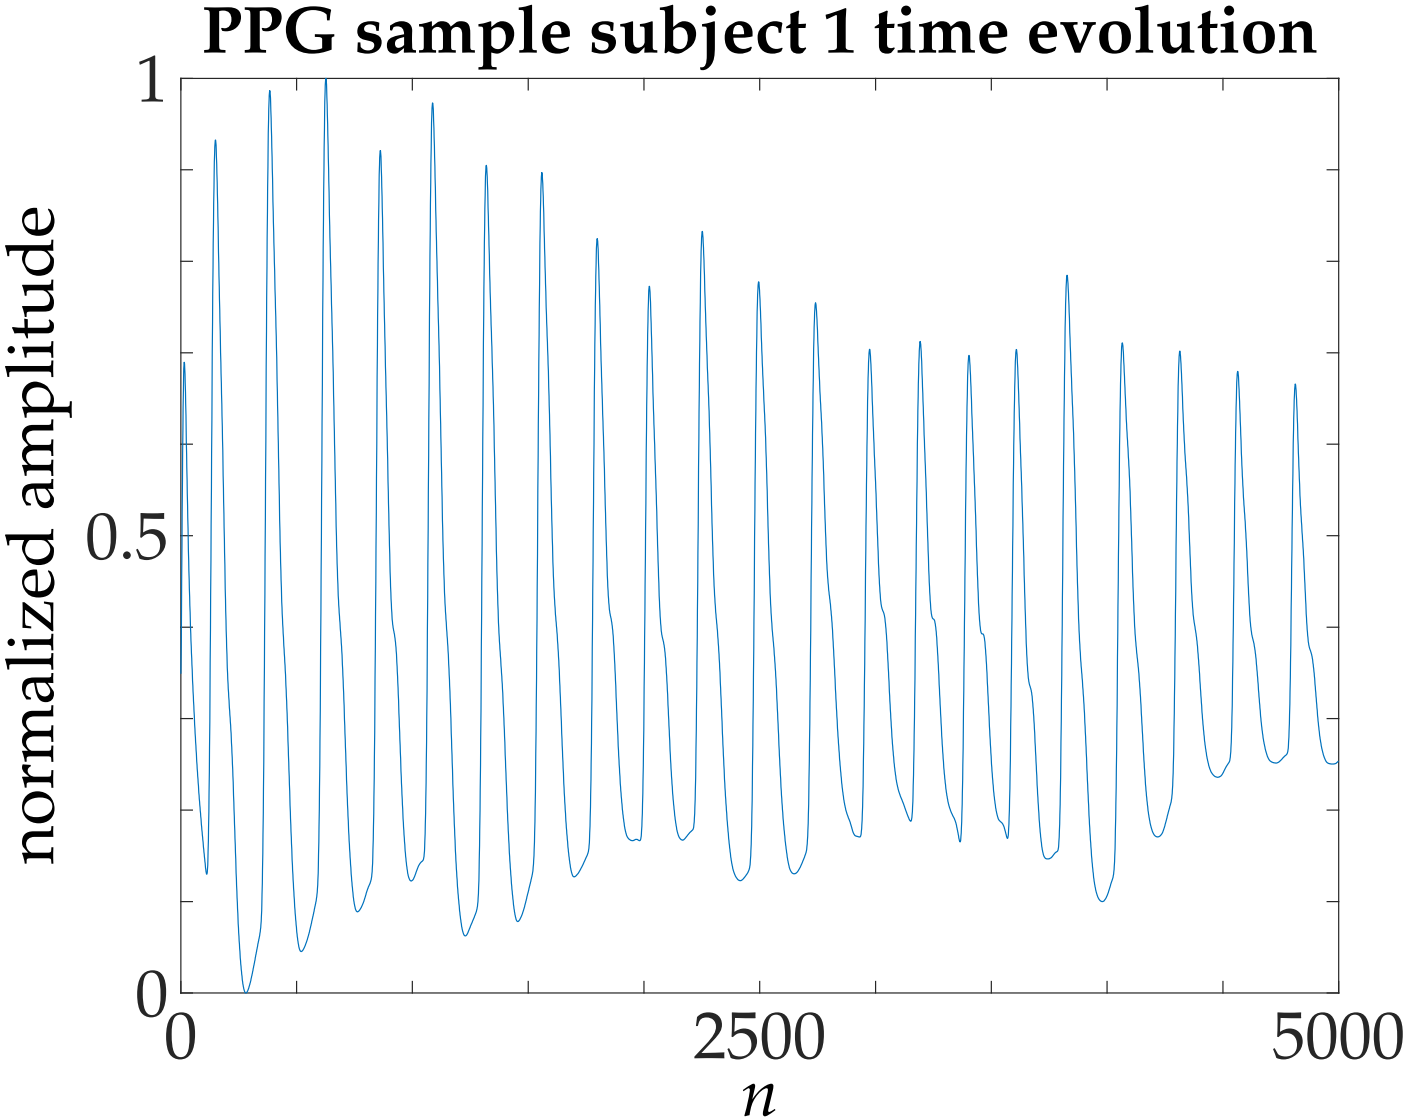

Supplement: s1 [file s1]

# aperiodic signal behavior

$q_c(n)$

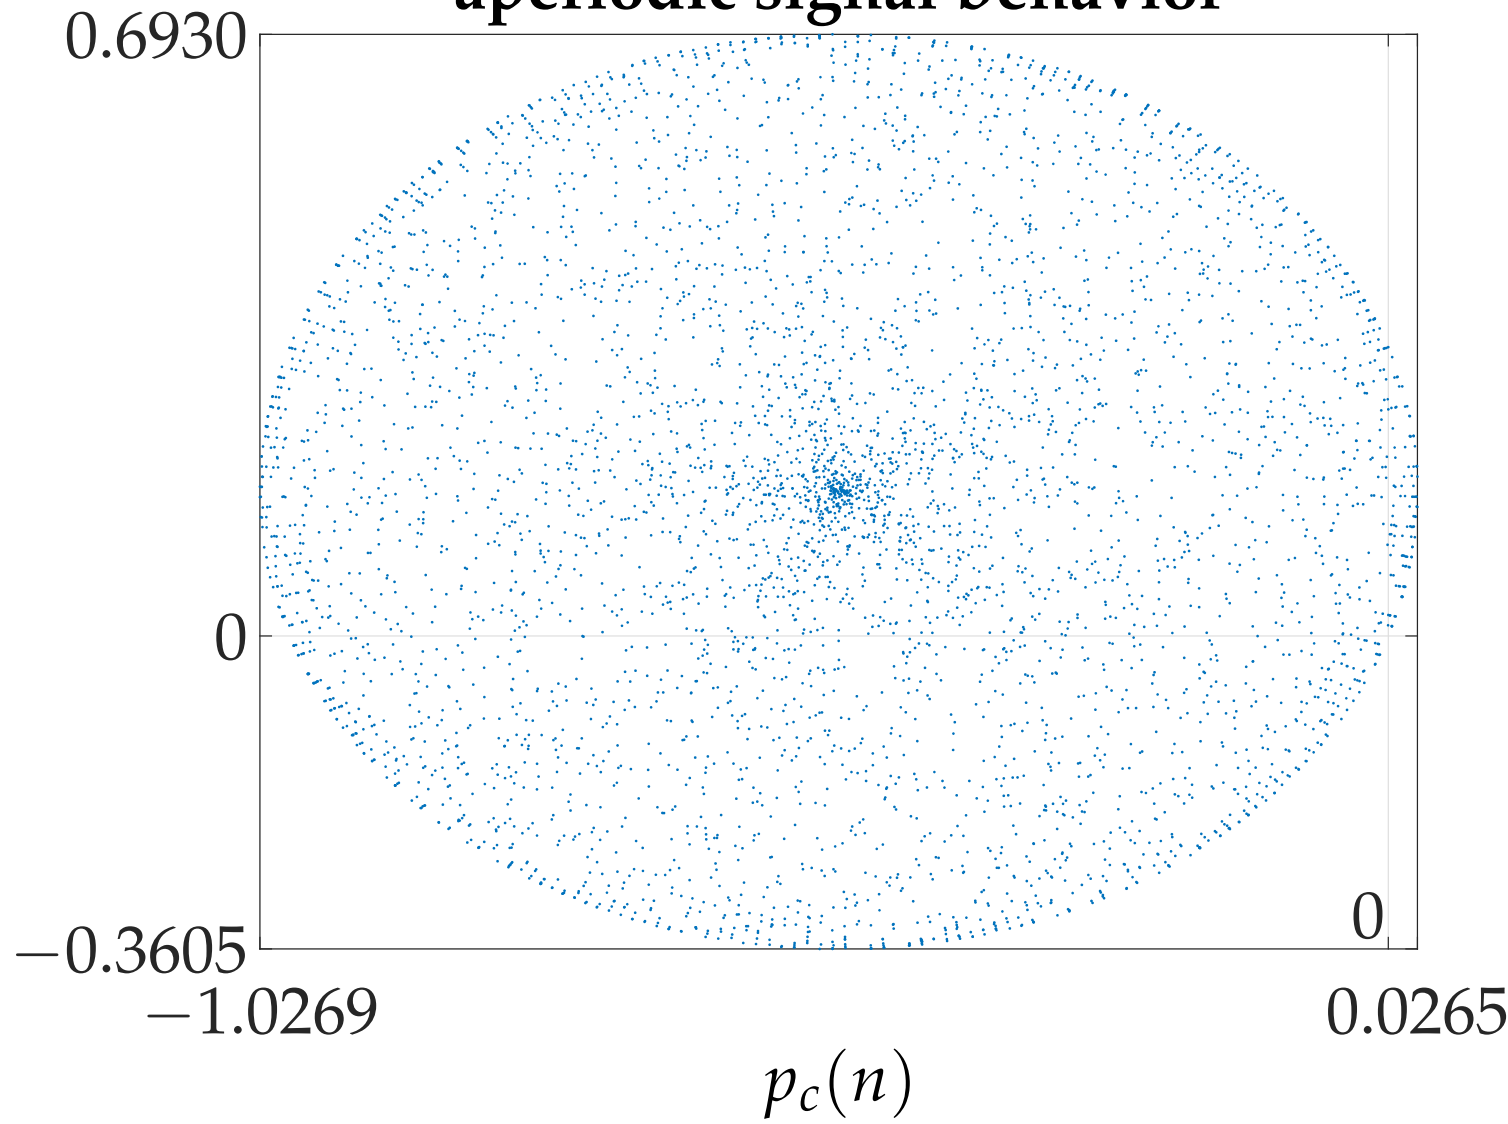

Supplement: s1 [file s1]

# PPG signal behavior subject 3

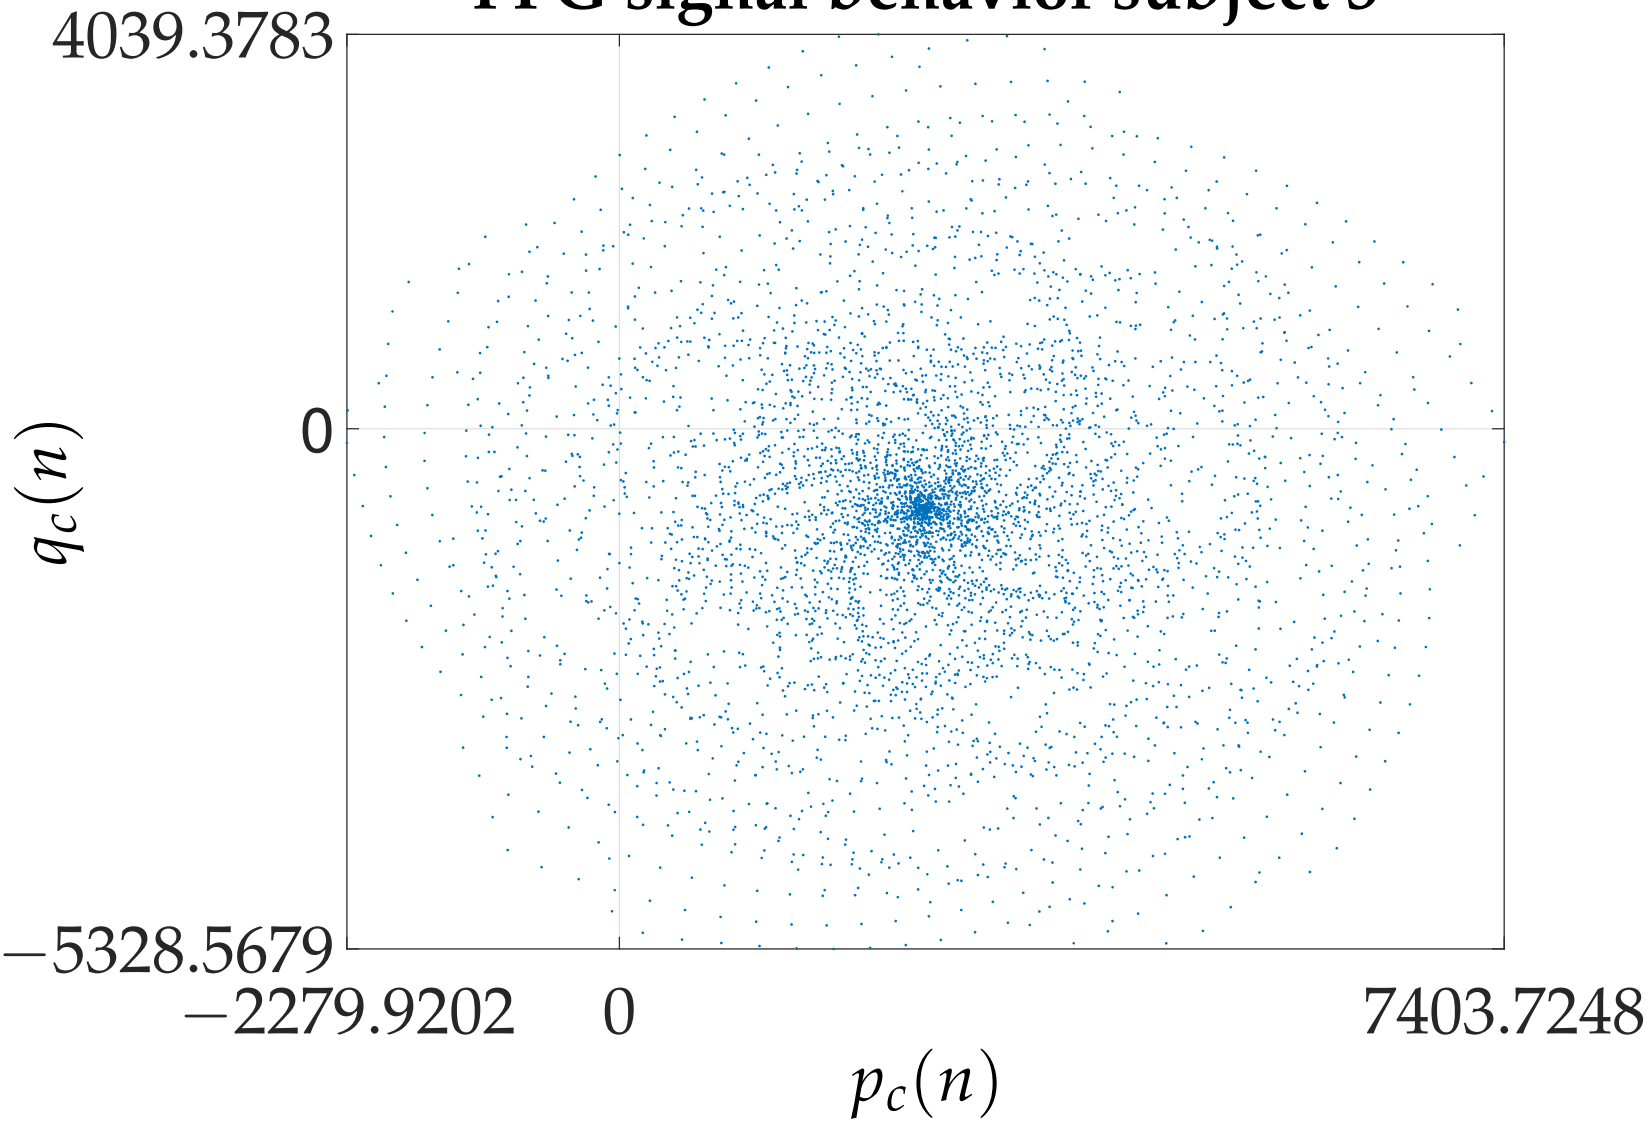

Supplement: s1 [file s1]

# random data diffusion coefficient

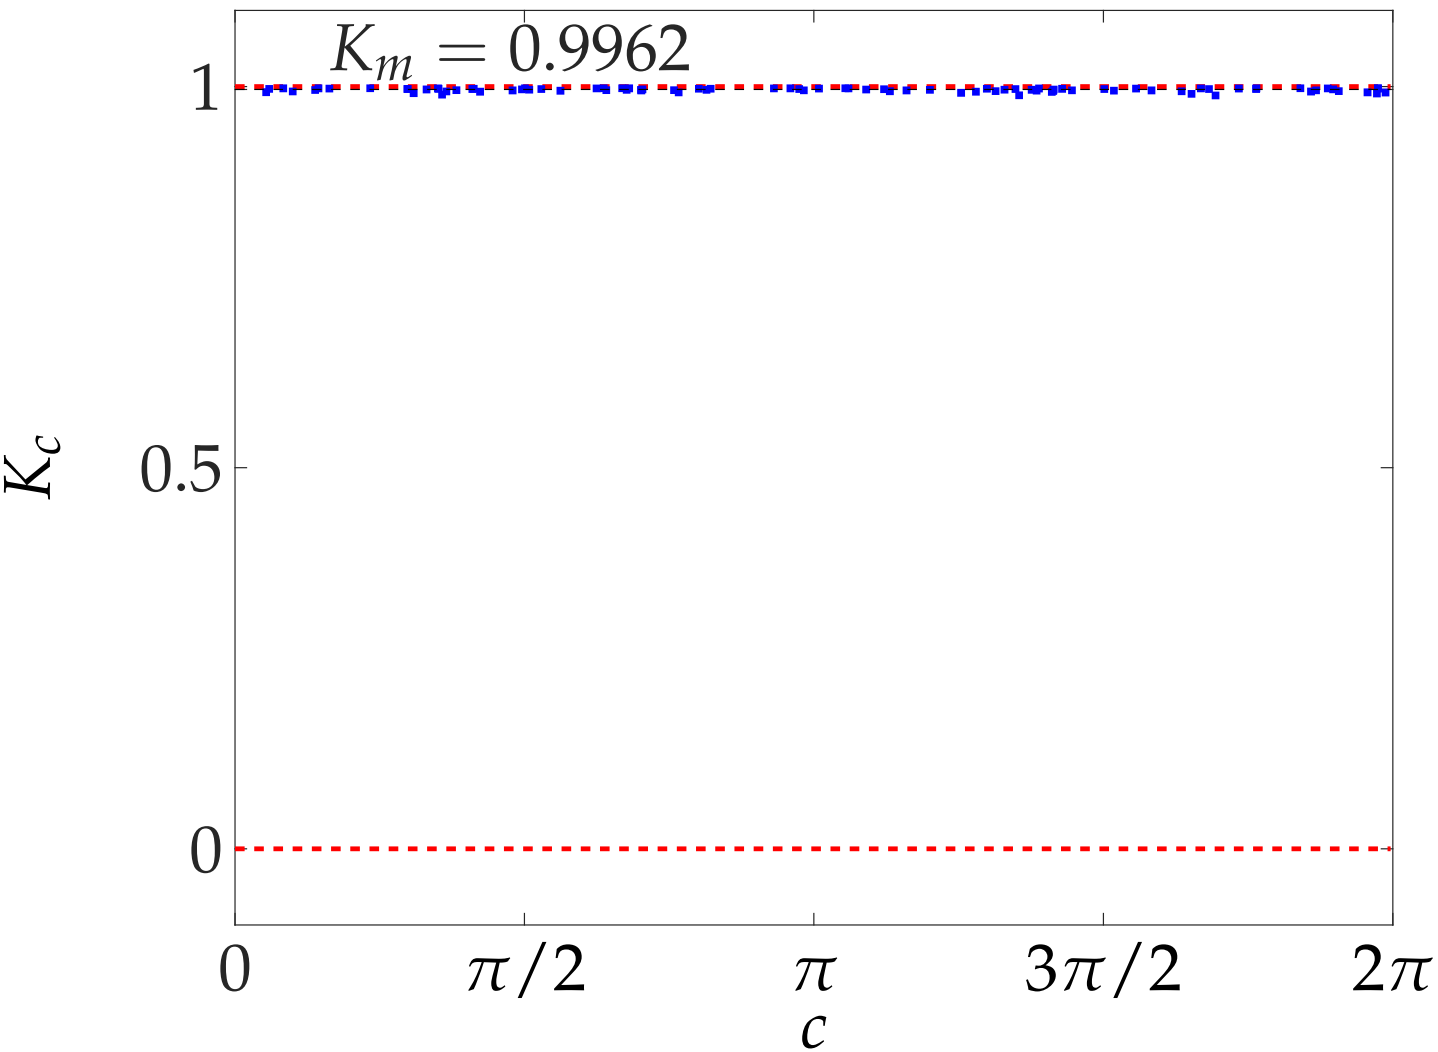

Supplement: s1 [file s1]

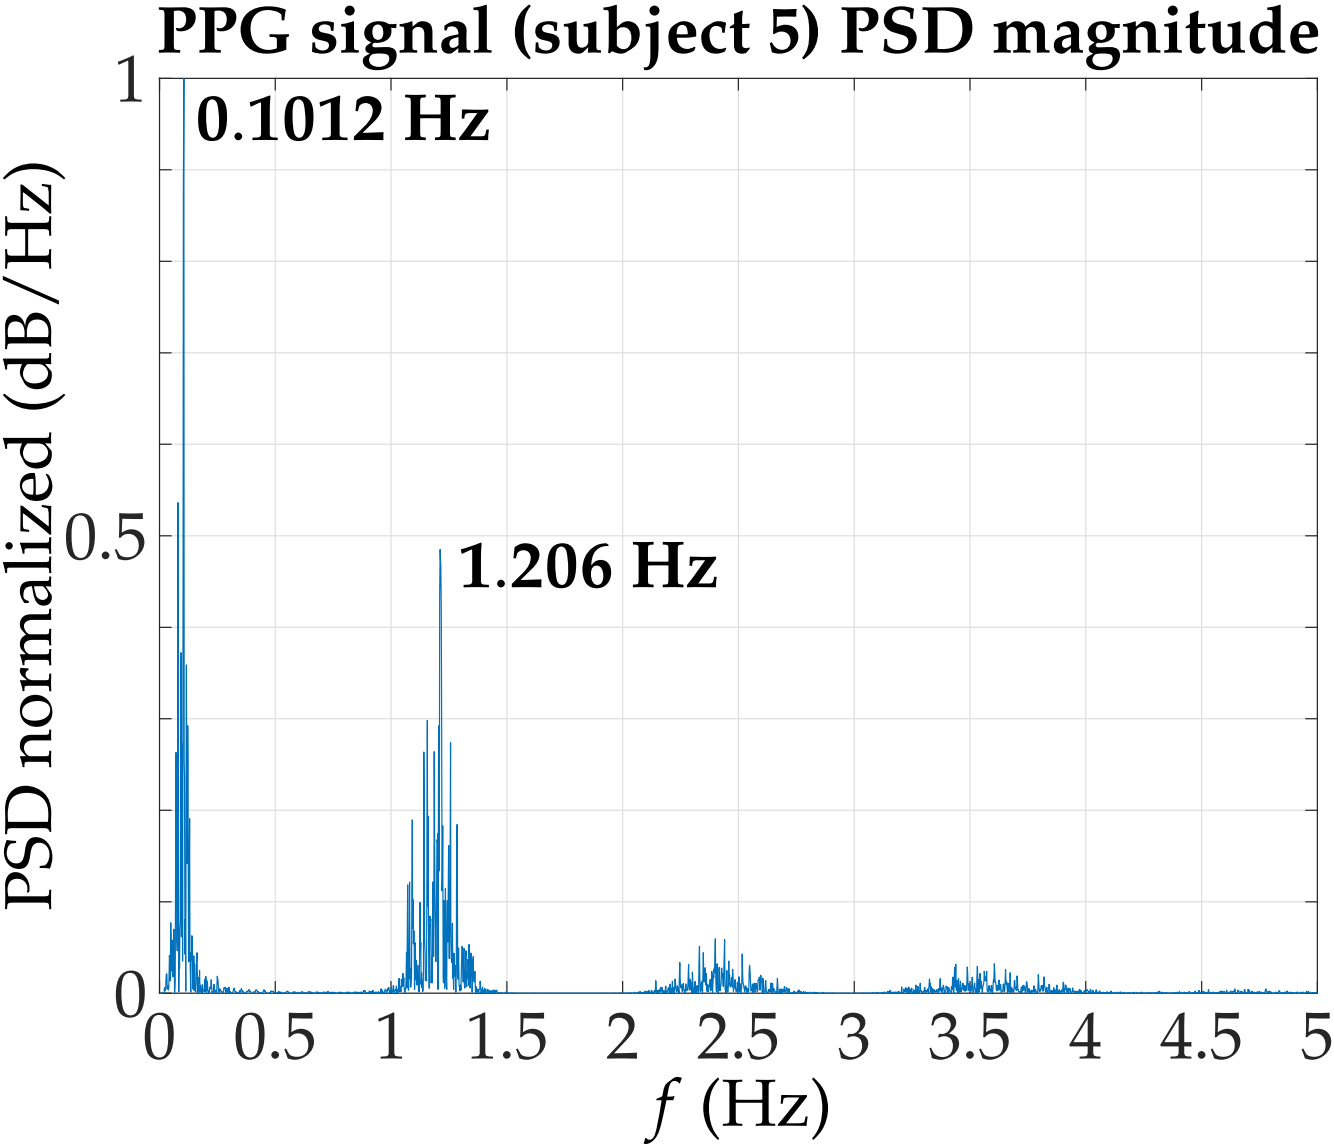

Supplement: s1 [file s1]

# aperiodic data diffusion coefficient

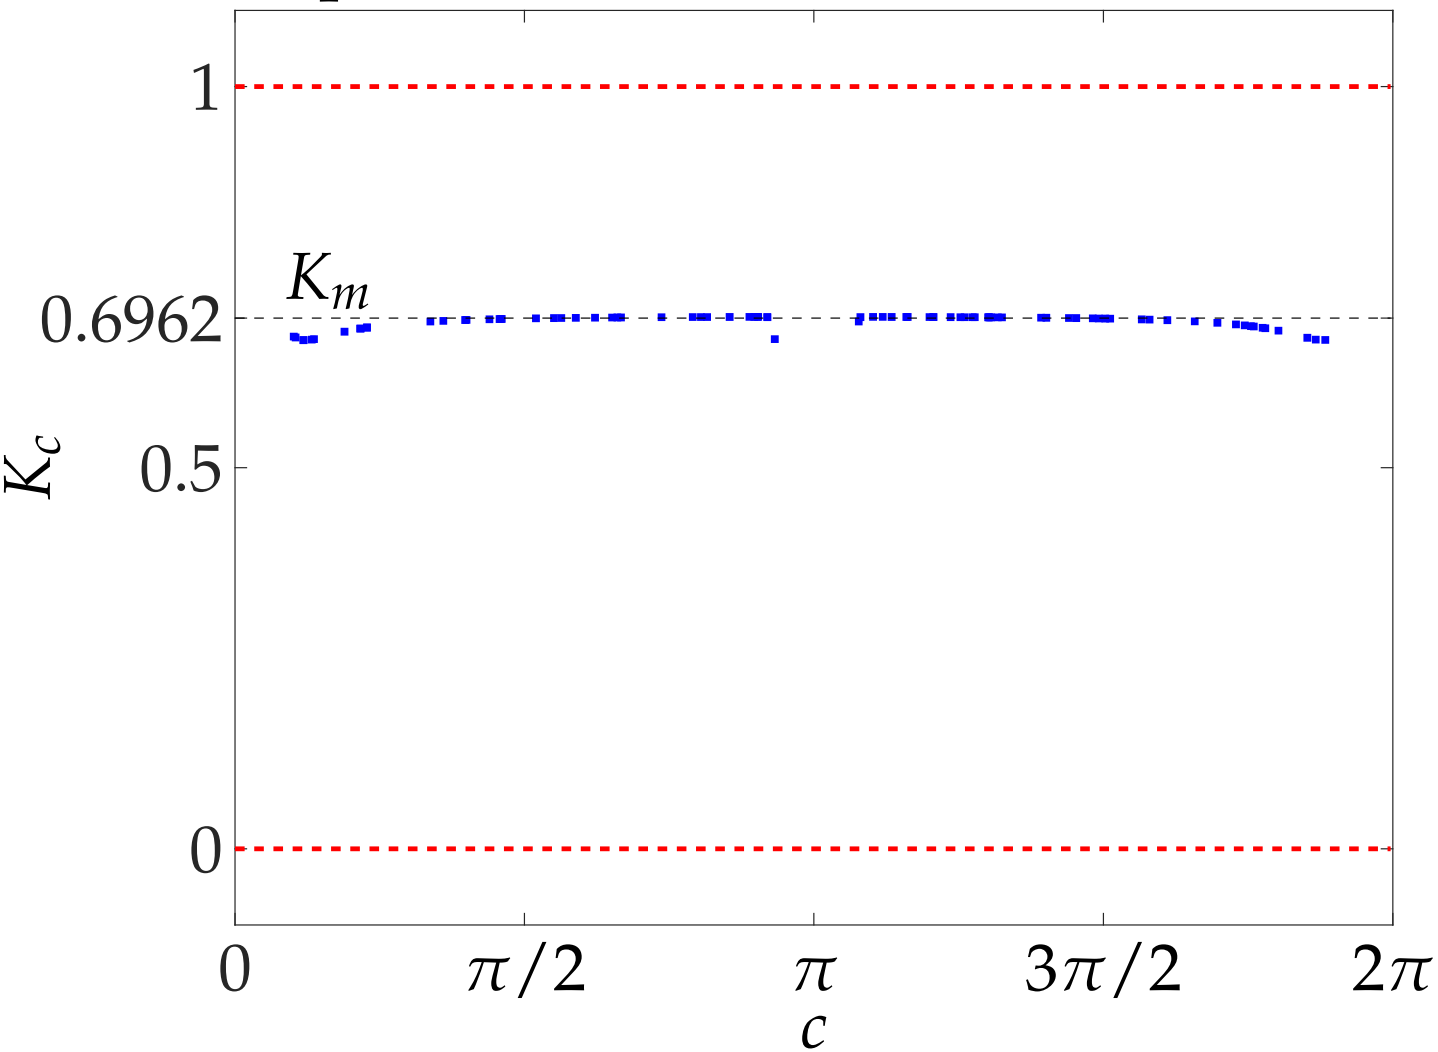

Supplement: s1 [file s1]

# random signal time evolution

normalized amplitude

1  
0.5  
0

250

500

$n$

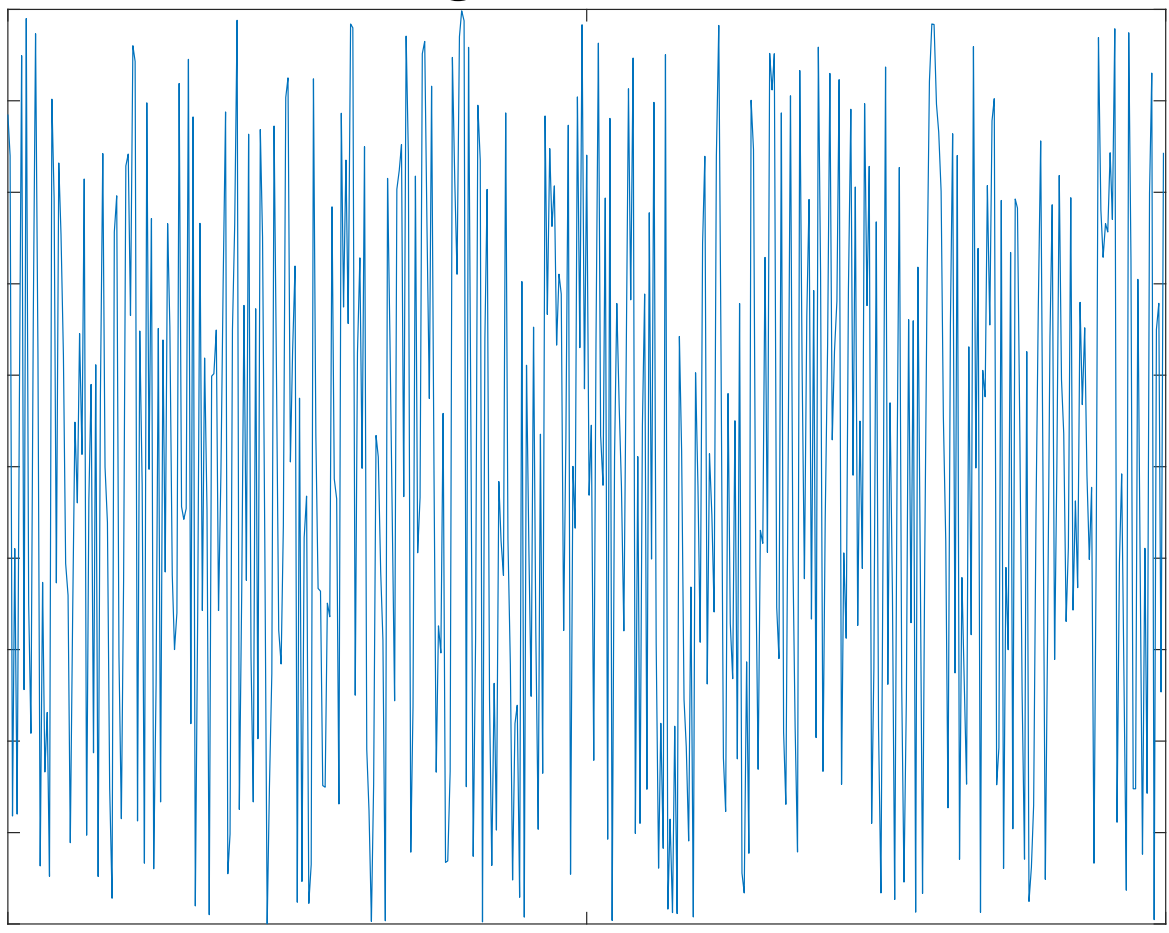

Supplement: s1 [file s1]

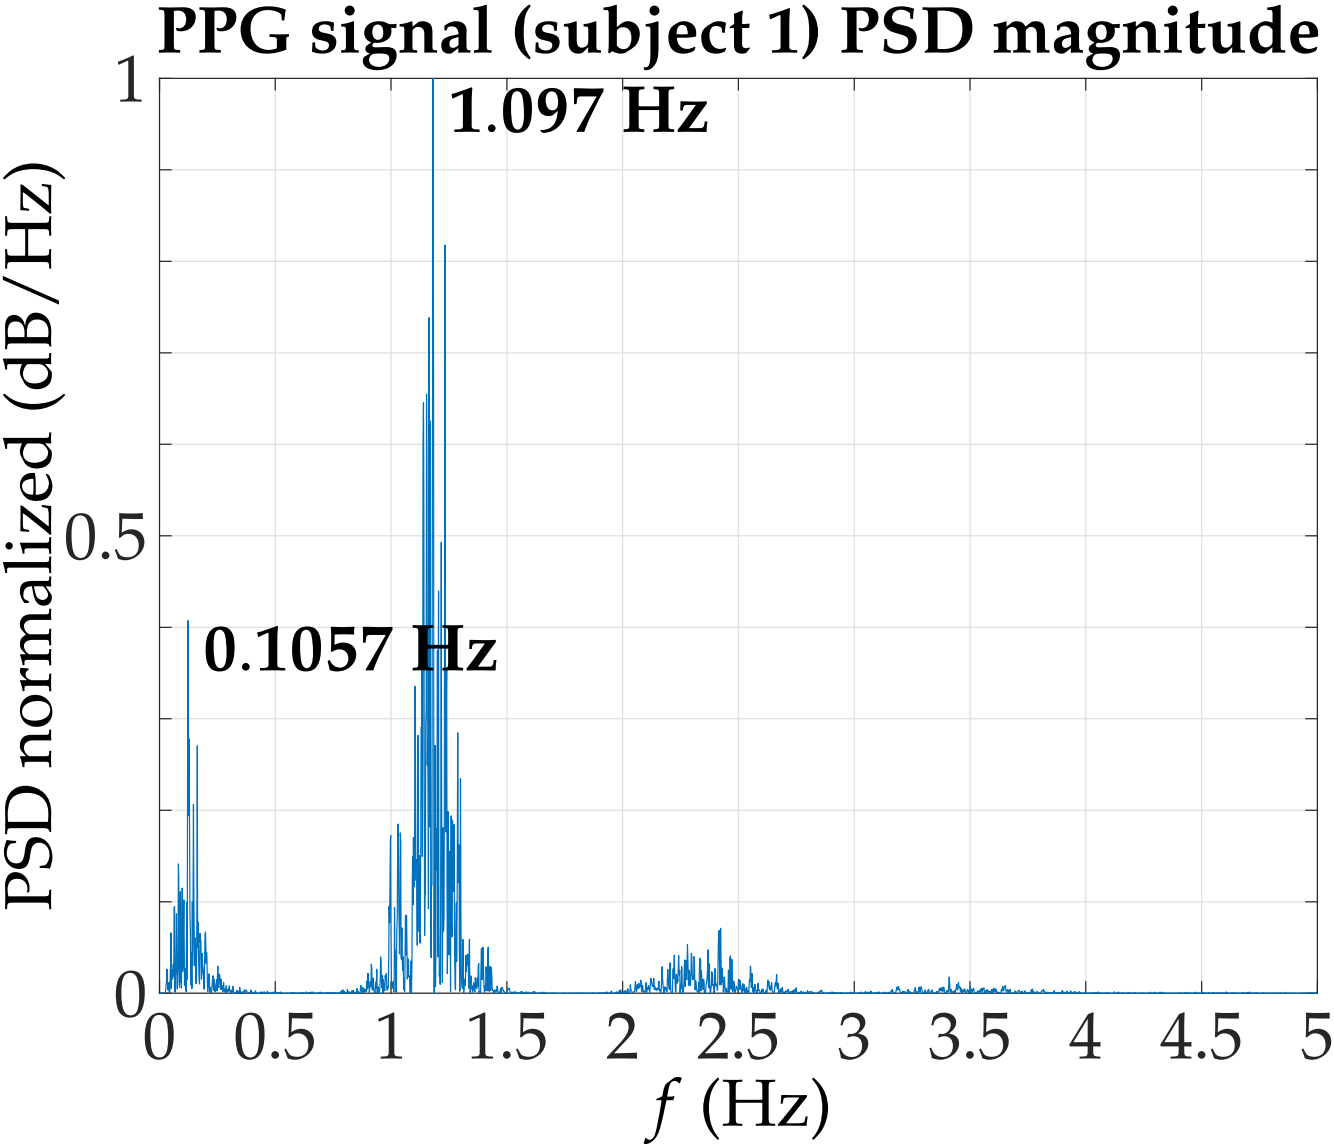

Supplement: s1 [file s1]

# PPG signal behavior subject 4

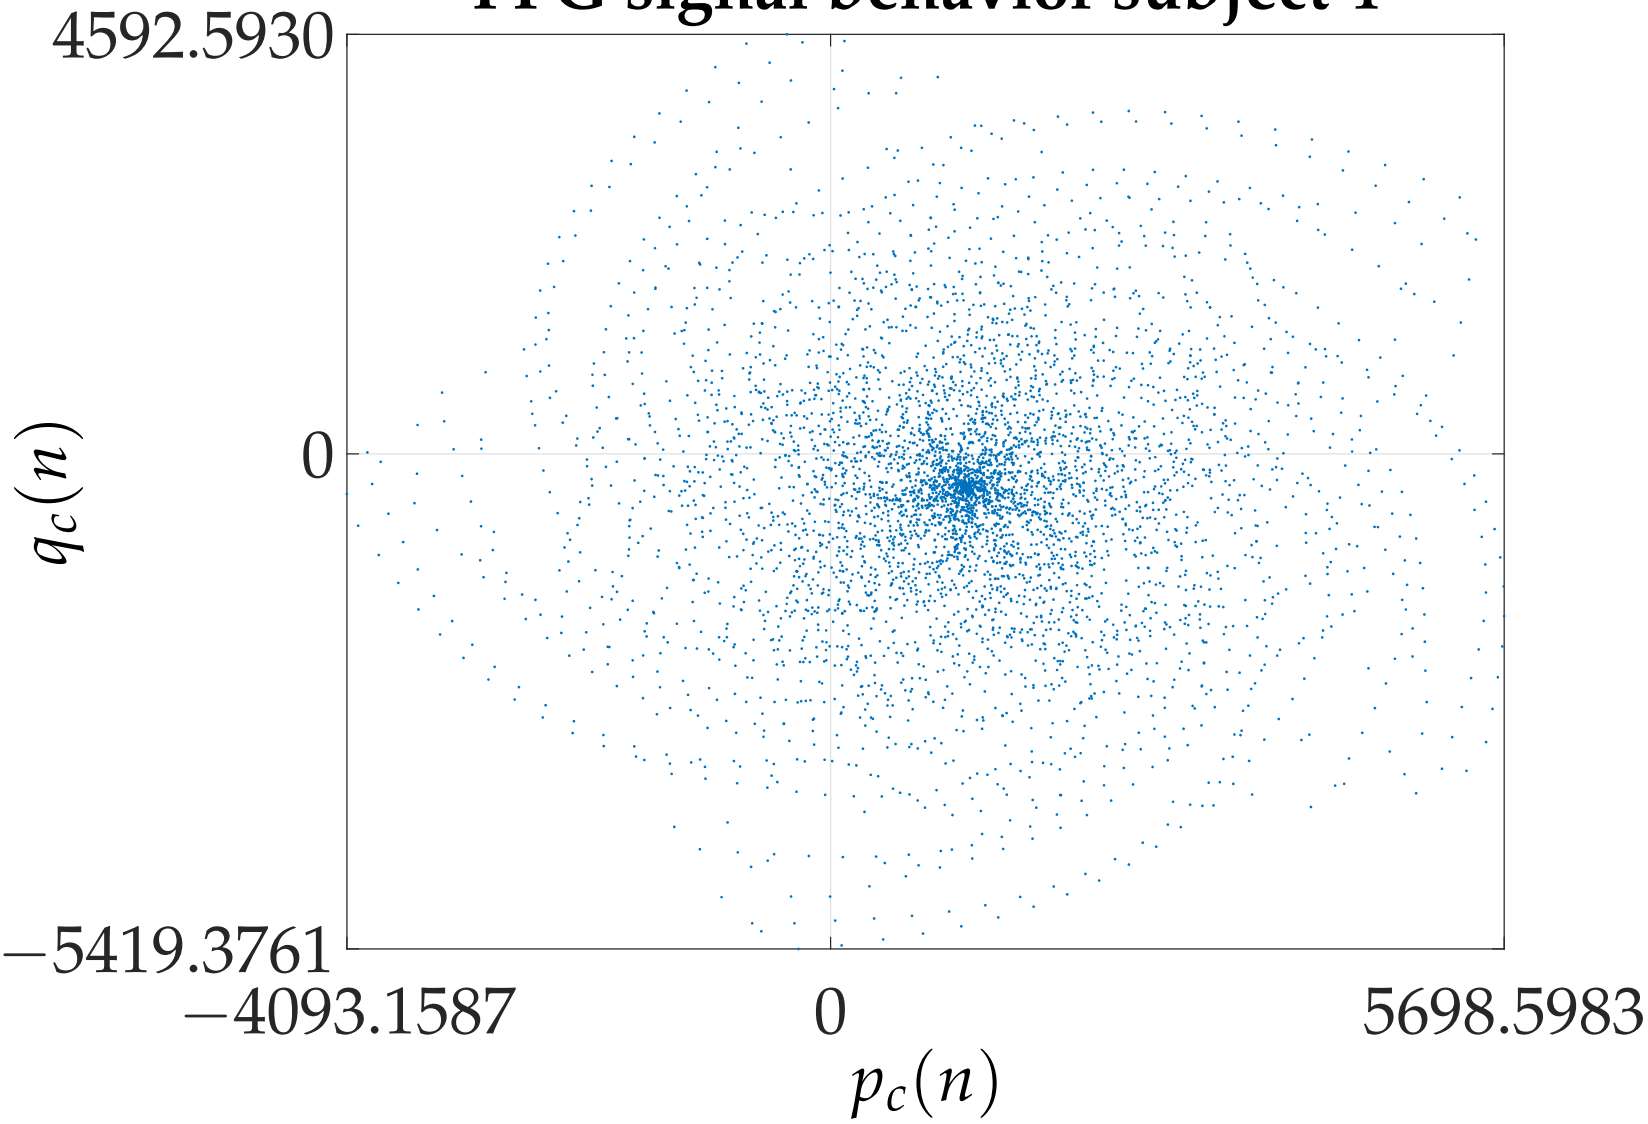

Supplement: s1 [file s1]

# PPG data subject 4 diffusion coefficient

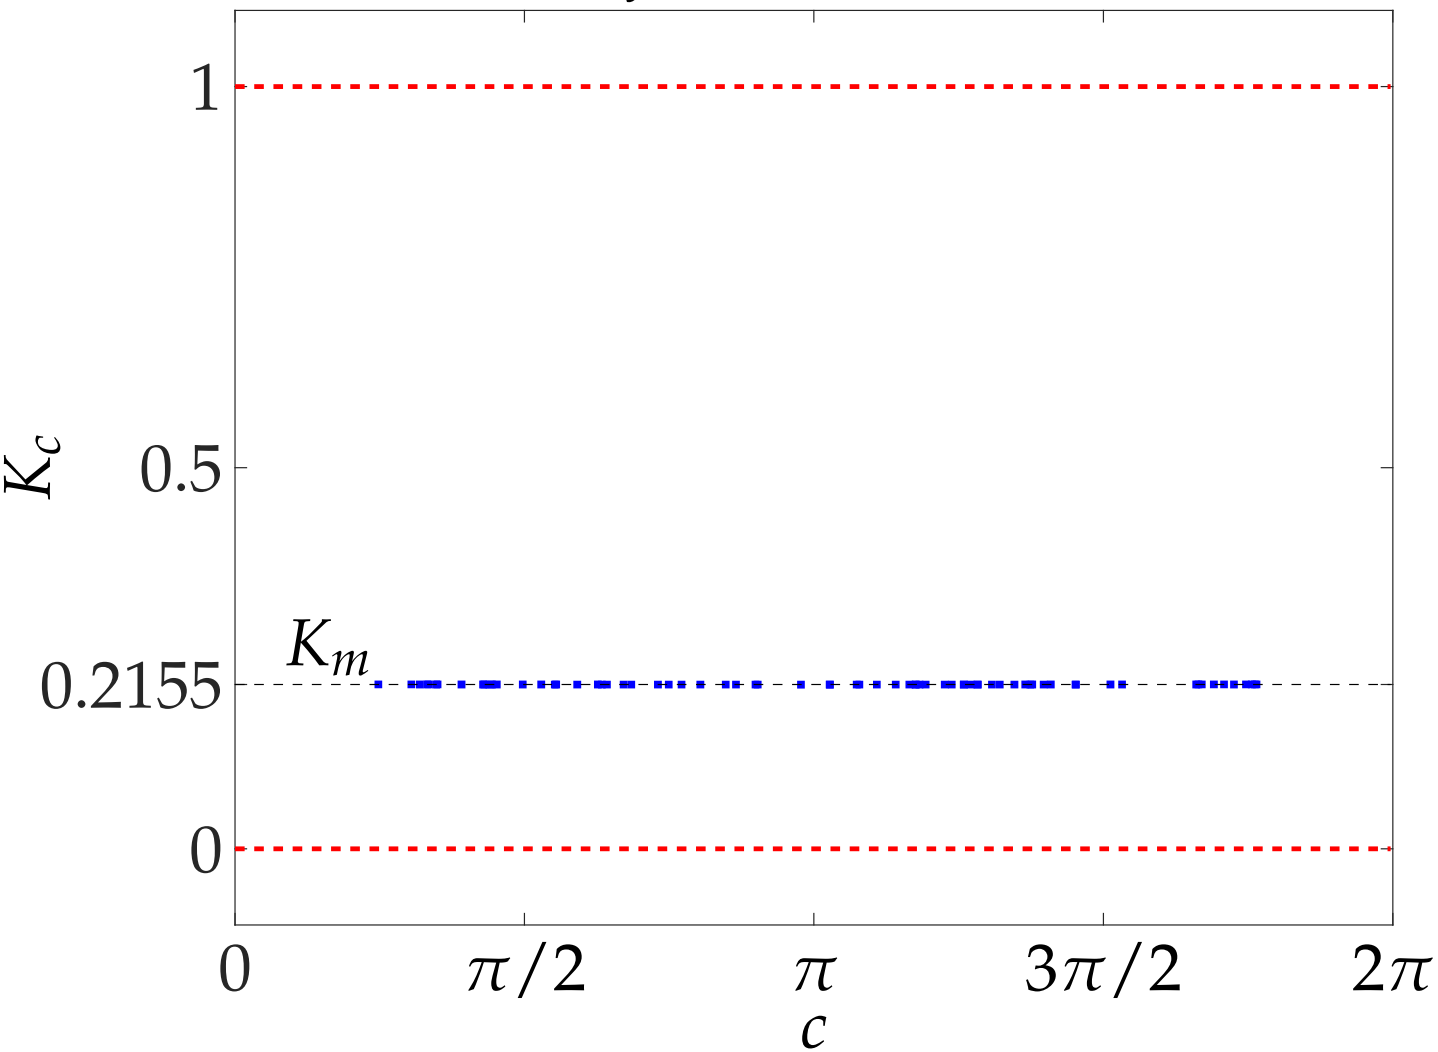

Supplement: s1 [file s1]

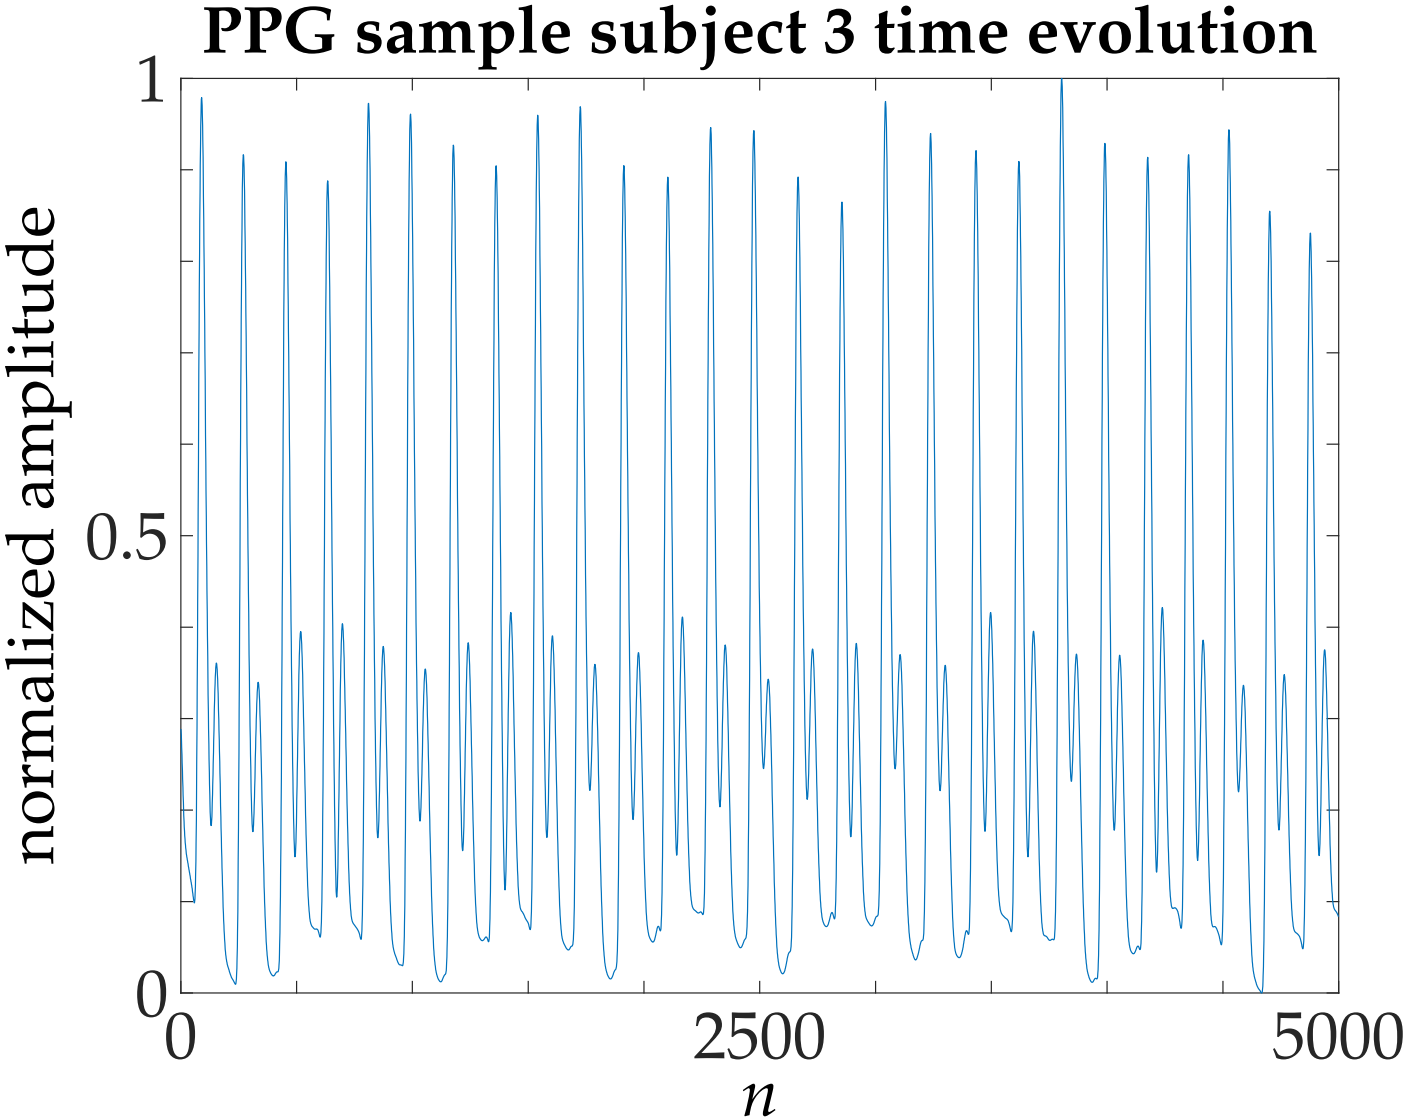

Supplement: s1 [file s1]

# PPG data subject 5 diffusion coefficient

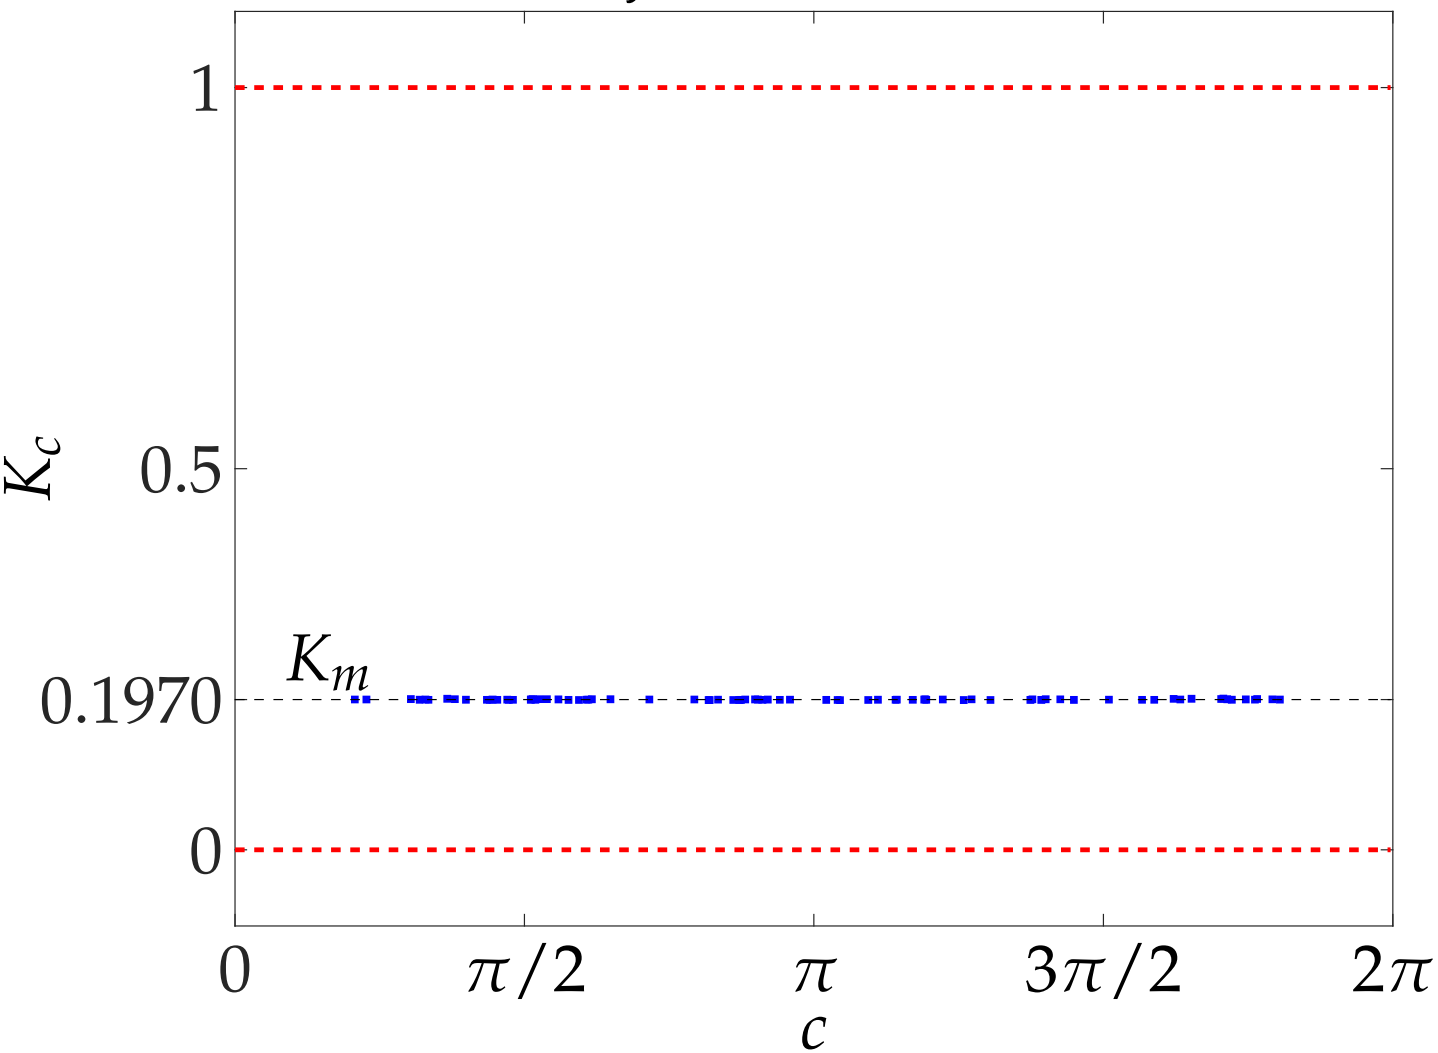

Supplement: s1 [file s1]

# PPG data subject 2 diffusion coefficient

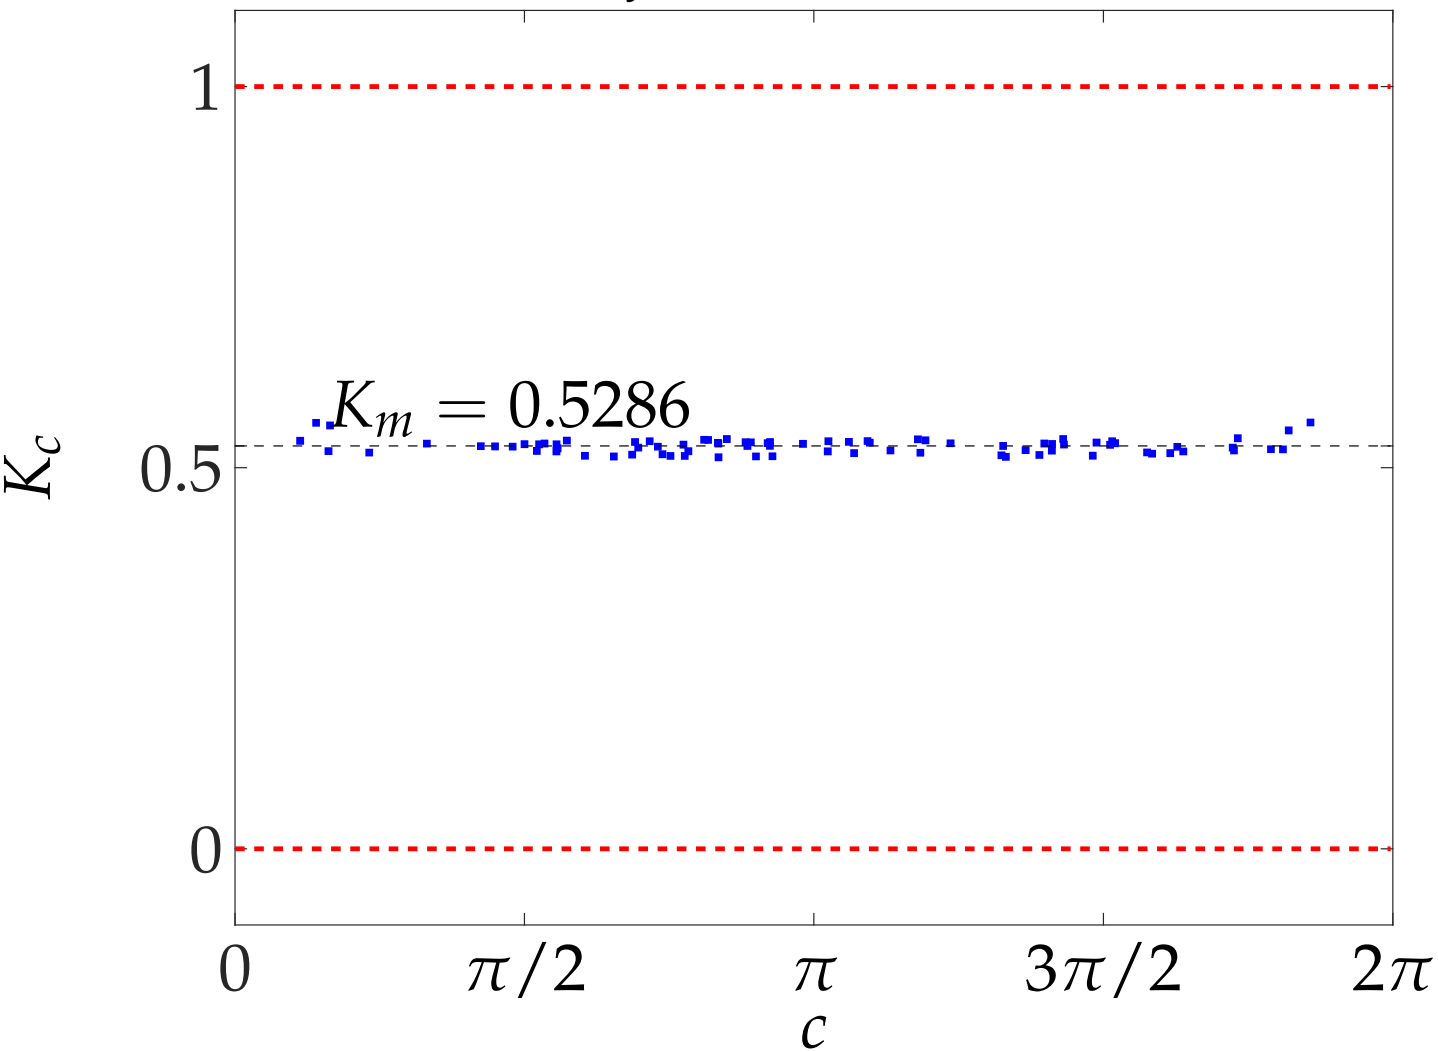

Supplement: s1 [file s1]

# PPG signal behavior subject 2

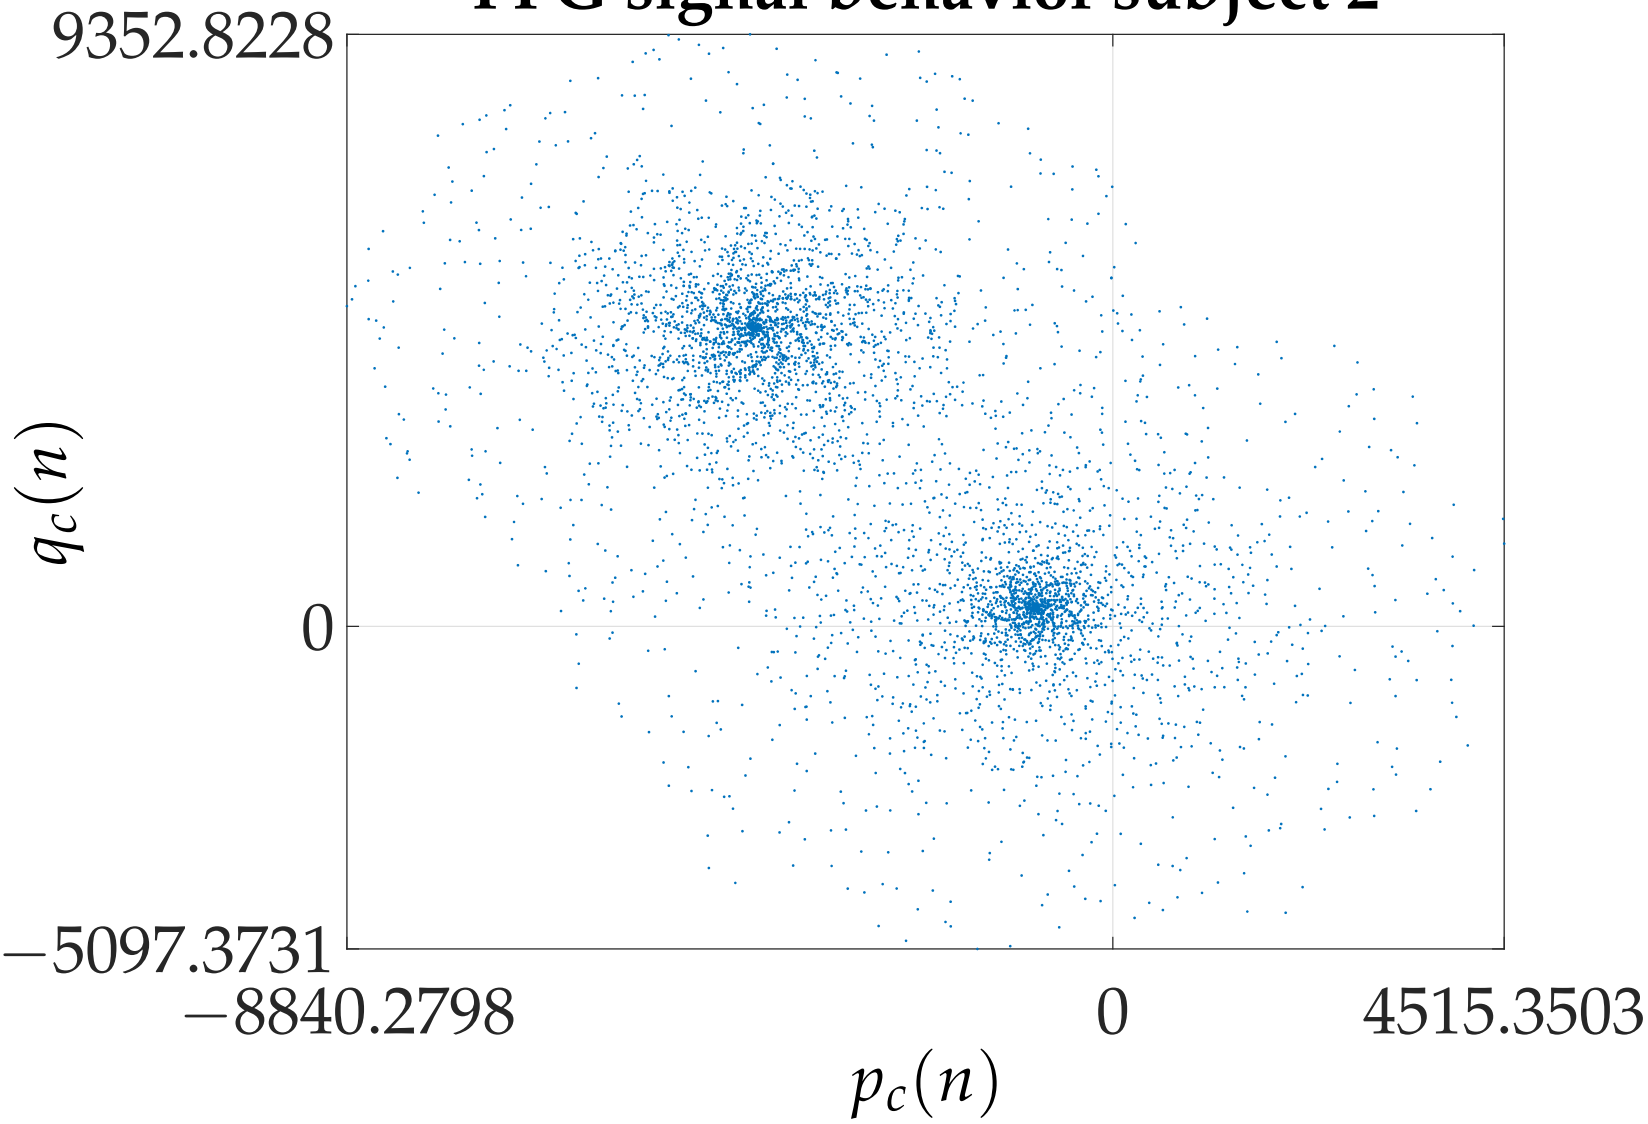

Supplement: s1 [file s1]

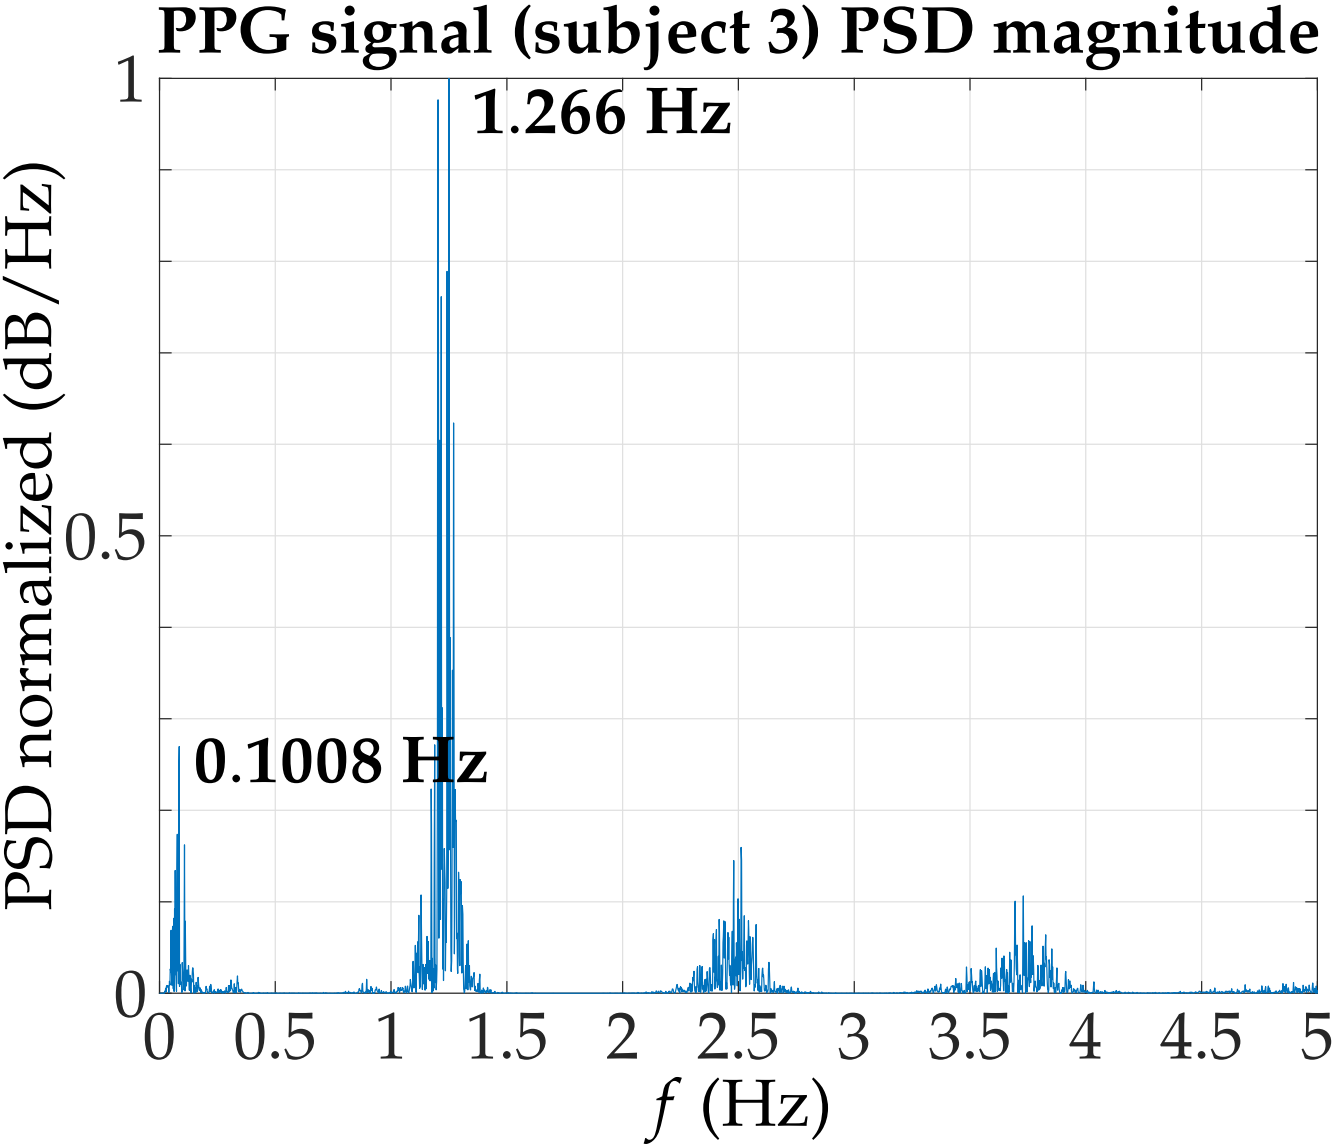

Supplement: s1 [file s1]

# quasi-periodic data diffusion coefficient

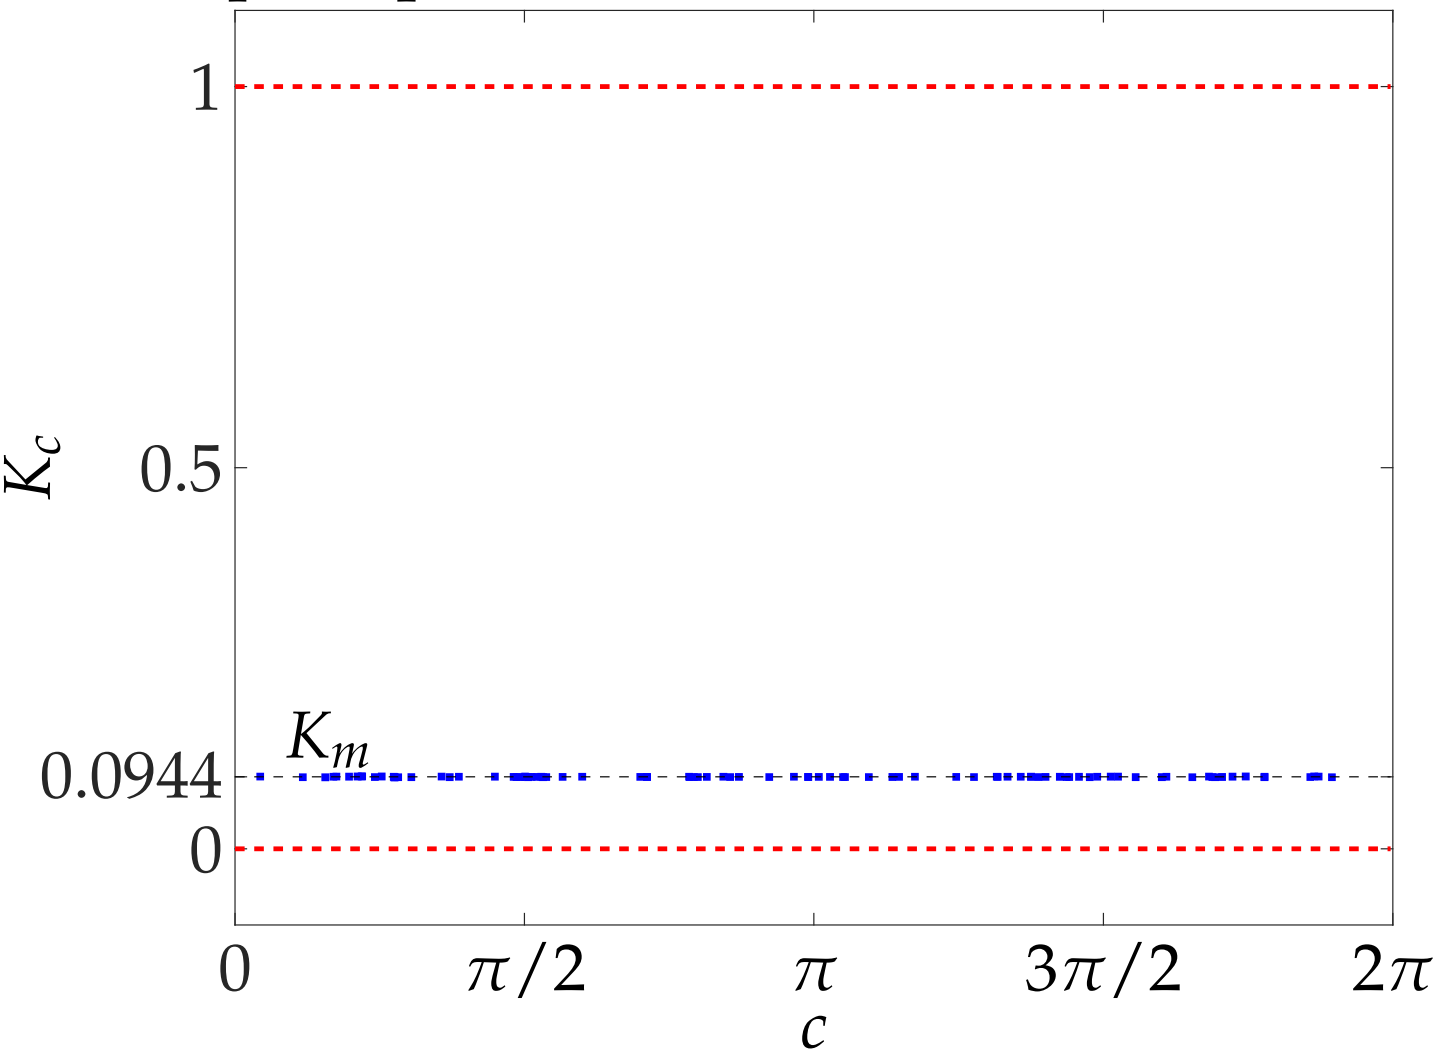

Supplement: s1 [file s1]

# PPG data subject 3 diffusion coefficient

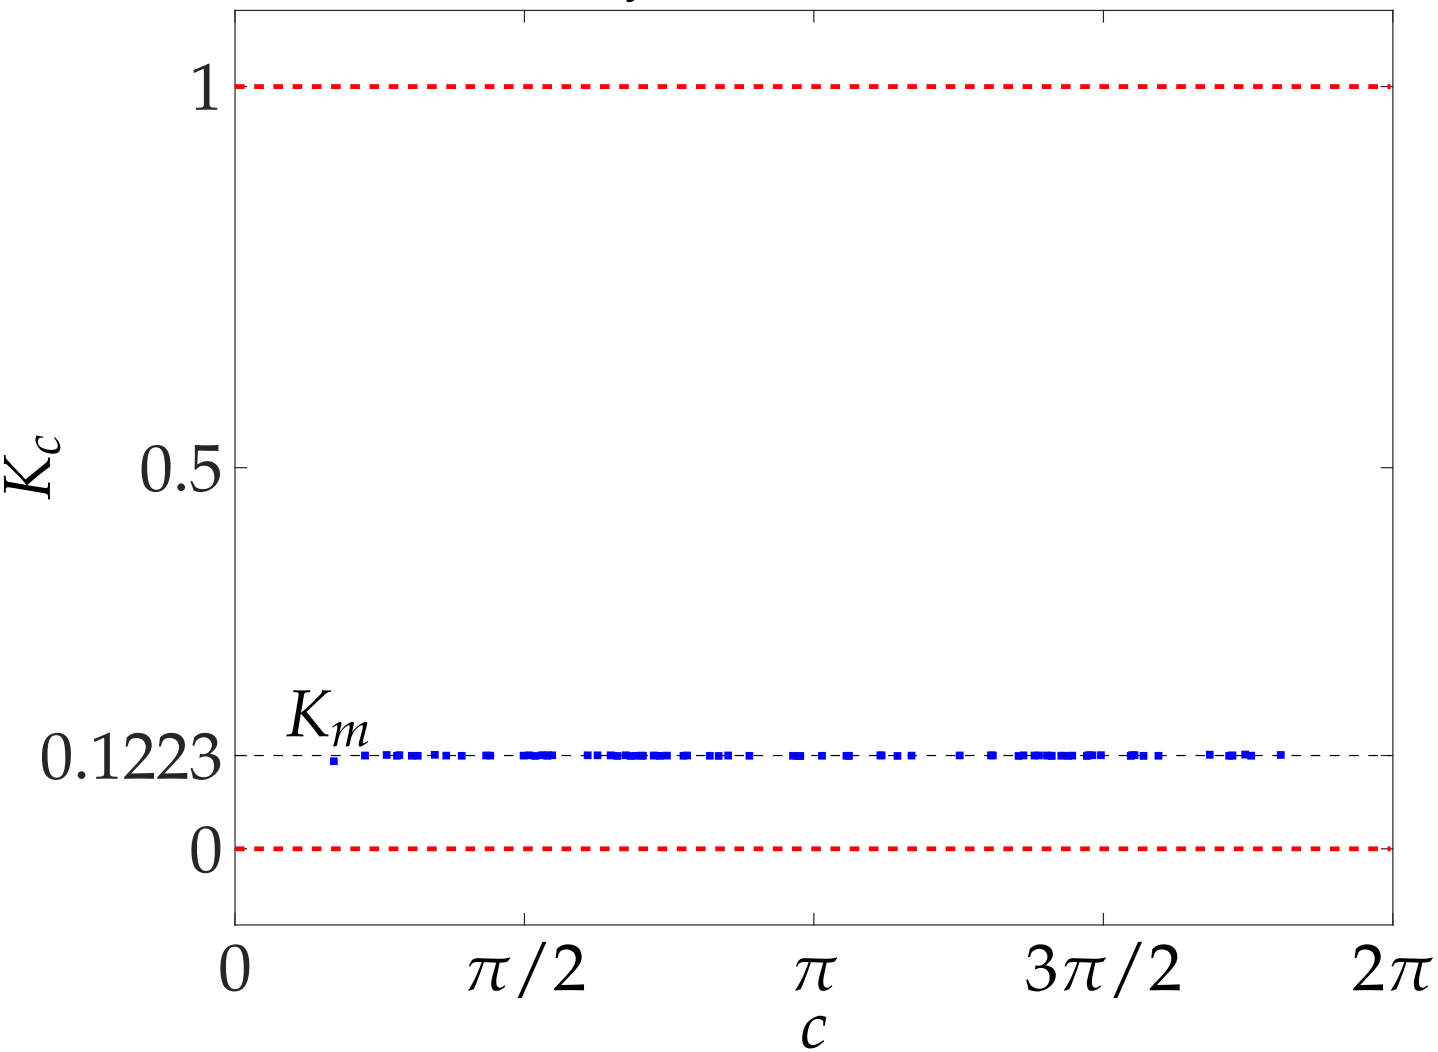

Supplement: s1 [file s1]

# quasi-periodic signal time evolution

normalized amplitude

1

0.5

0

10000

20000

$n$

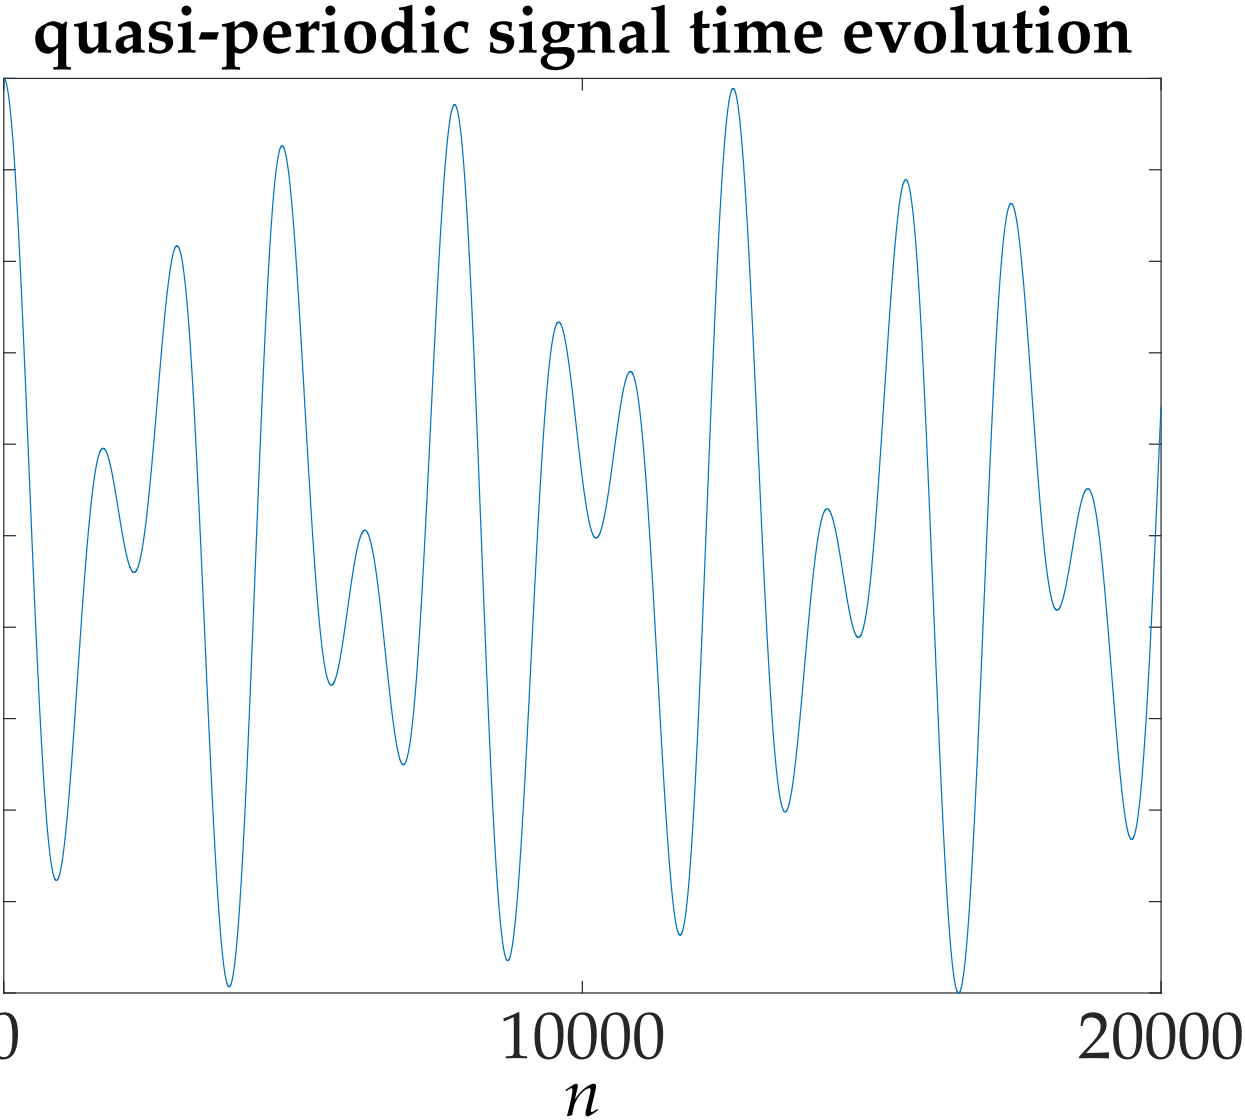

Supplement: s1 [file s1]

# chaotic signal PSD magnitude

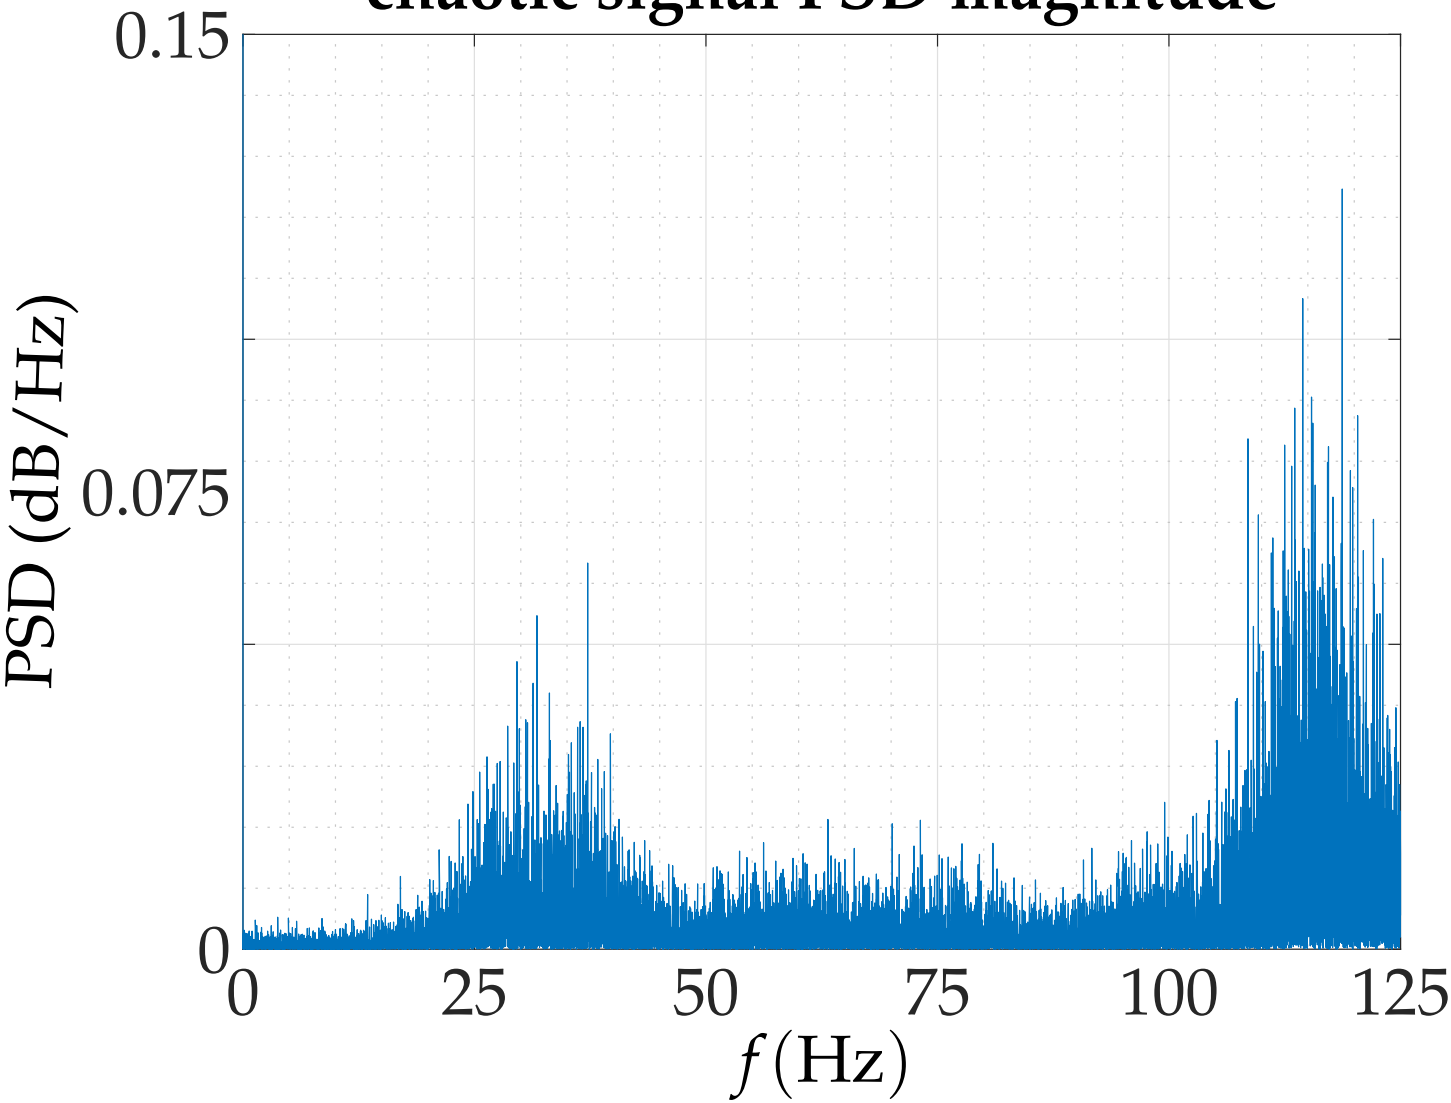

Supplement: s1 [file s1]

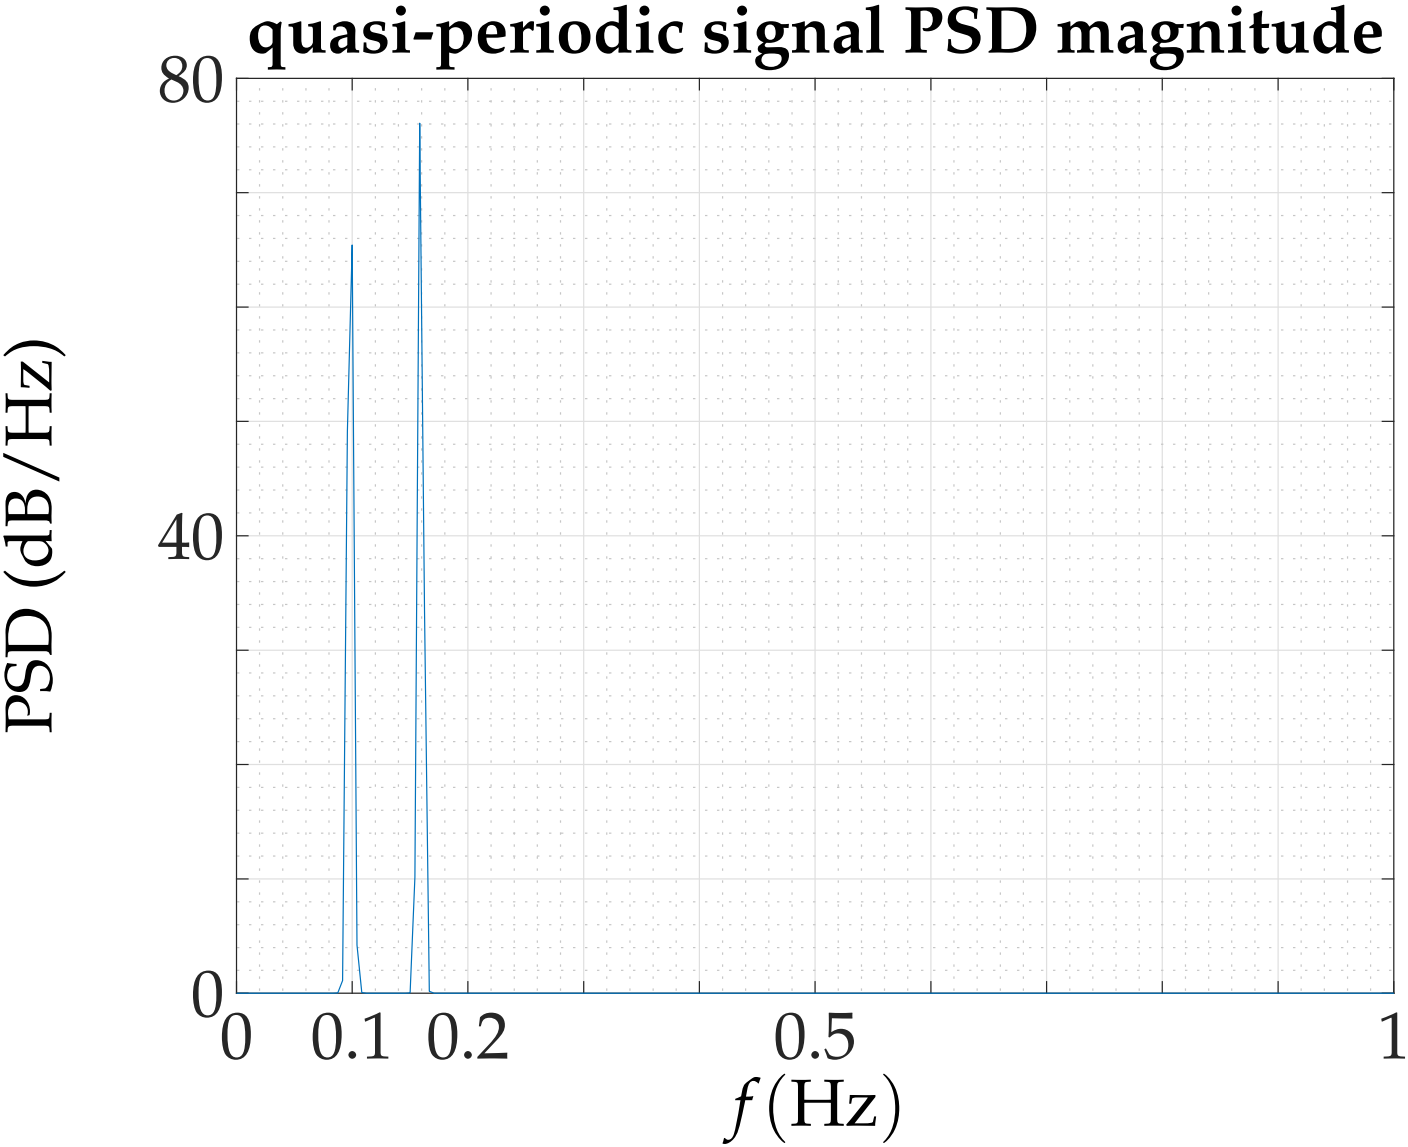

Supplement: s1 [file s1]

# periodic data diffusion coefficient

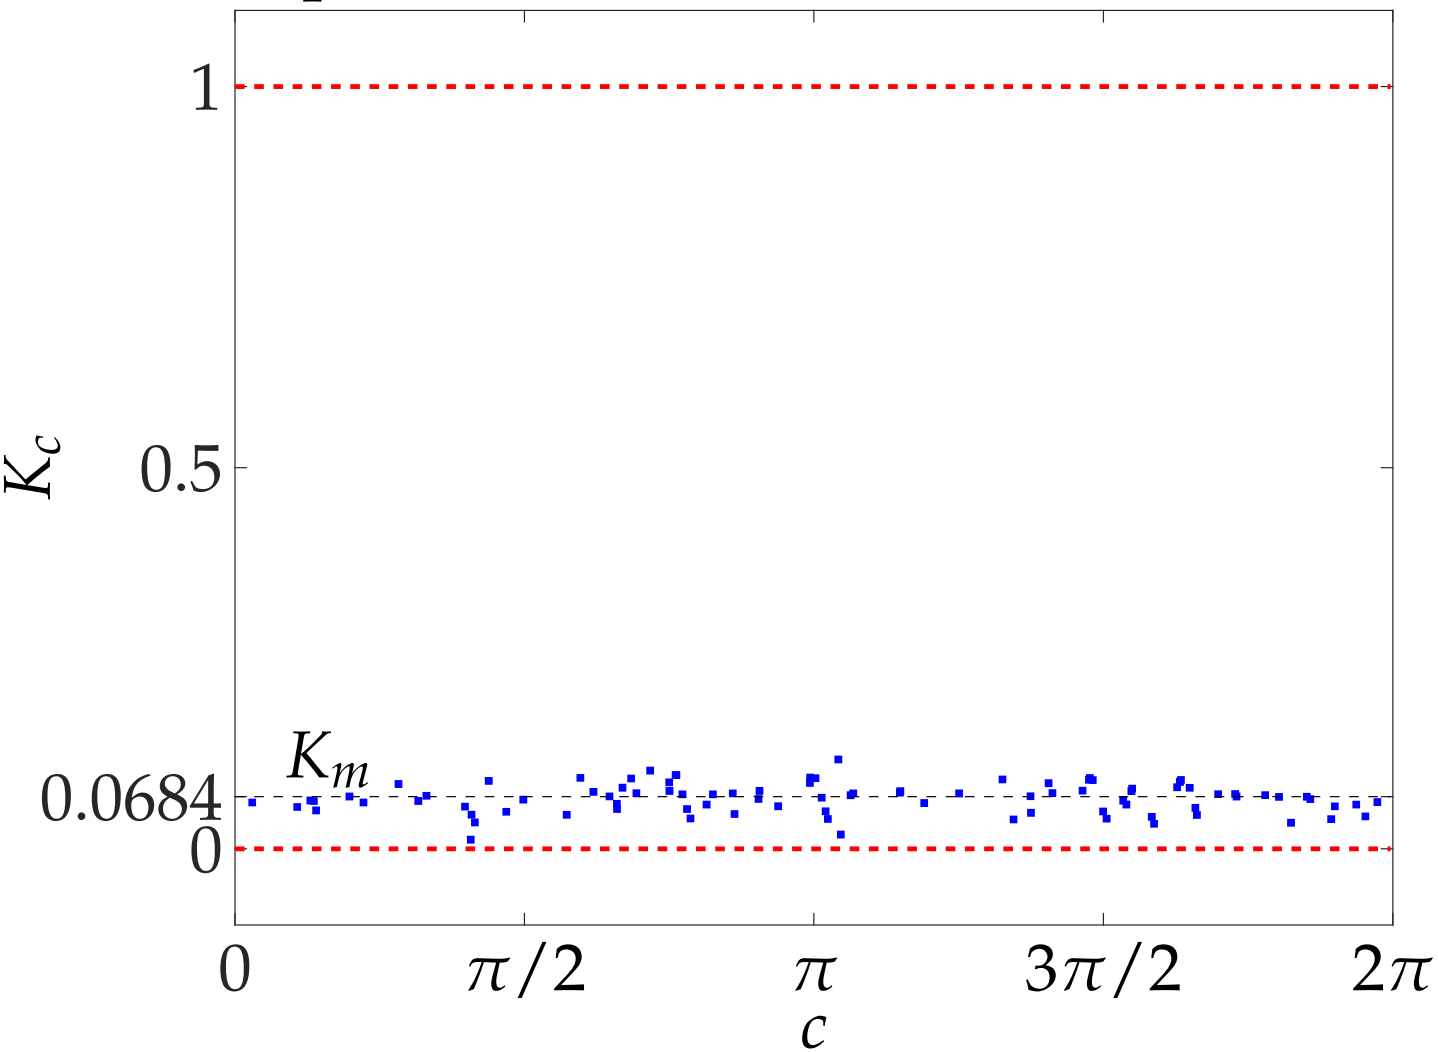

Supplement: s1 [file s1]

# PPG data subject 1 diffusion coefficient

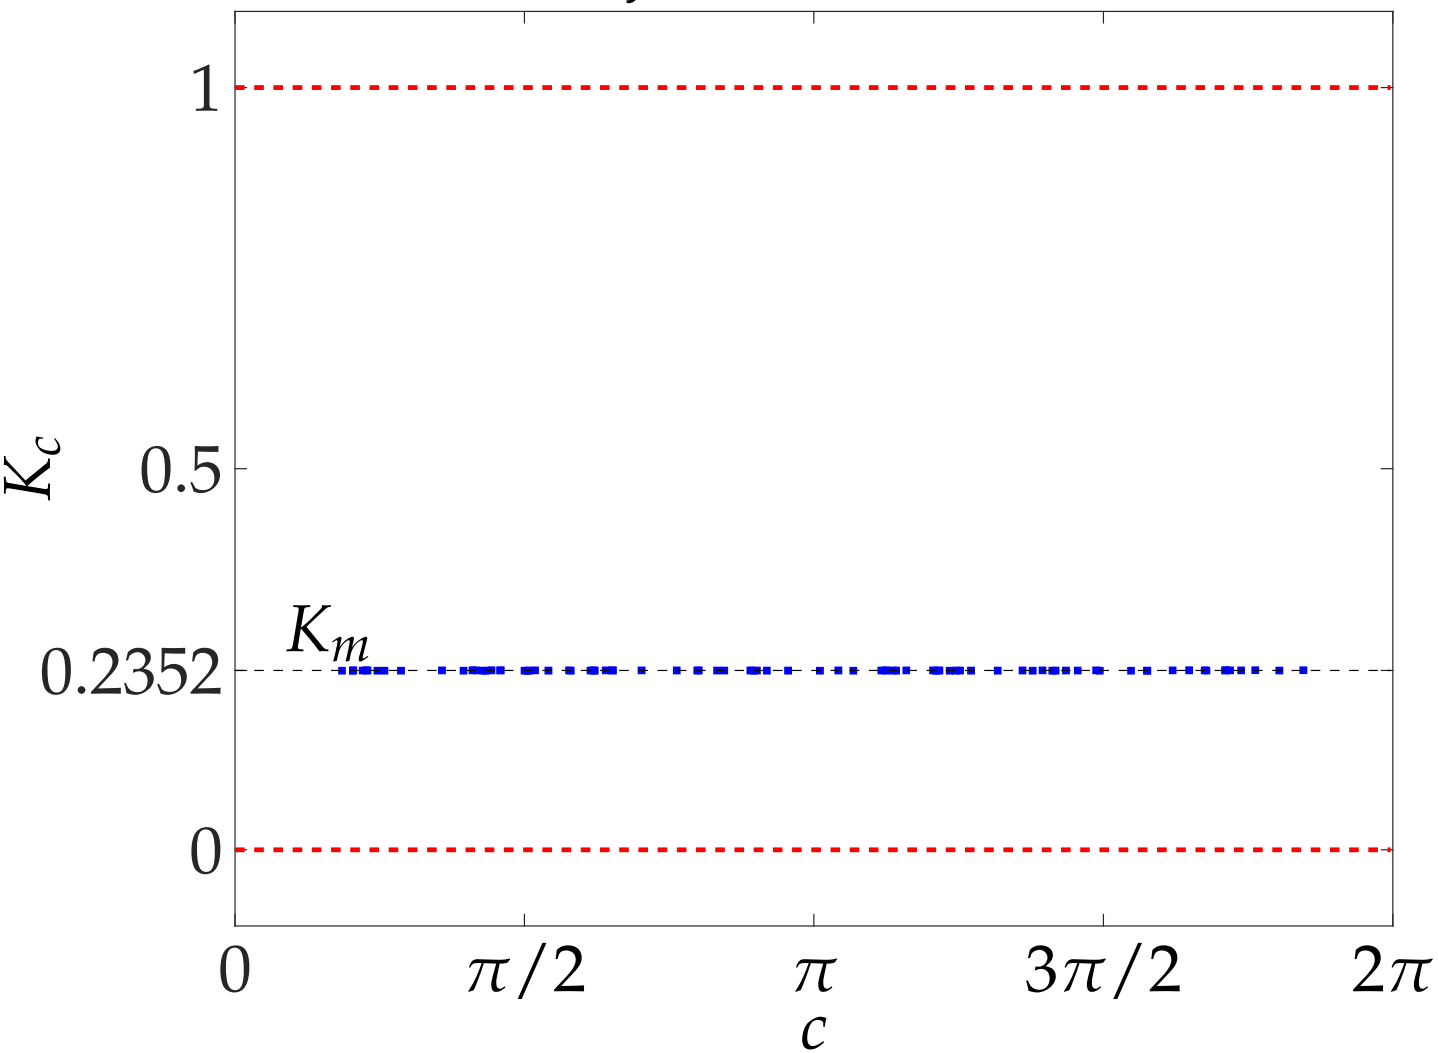

Supplement: s1 [file s1]

# random signal PSD magnitude

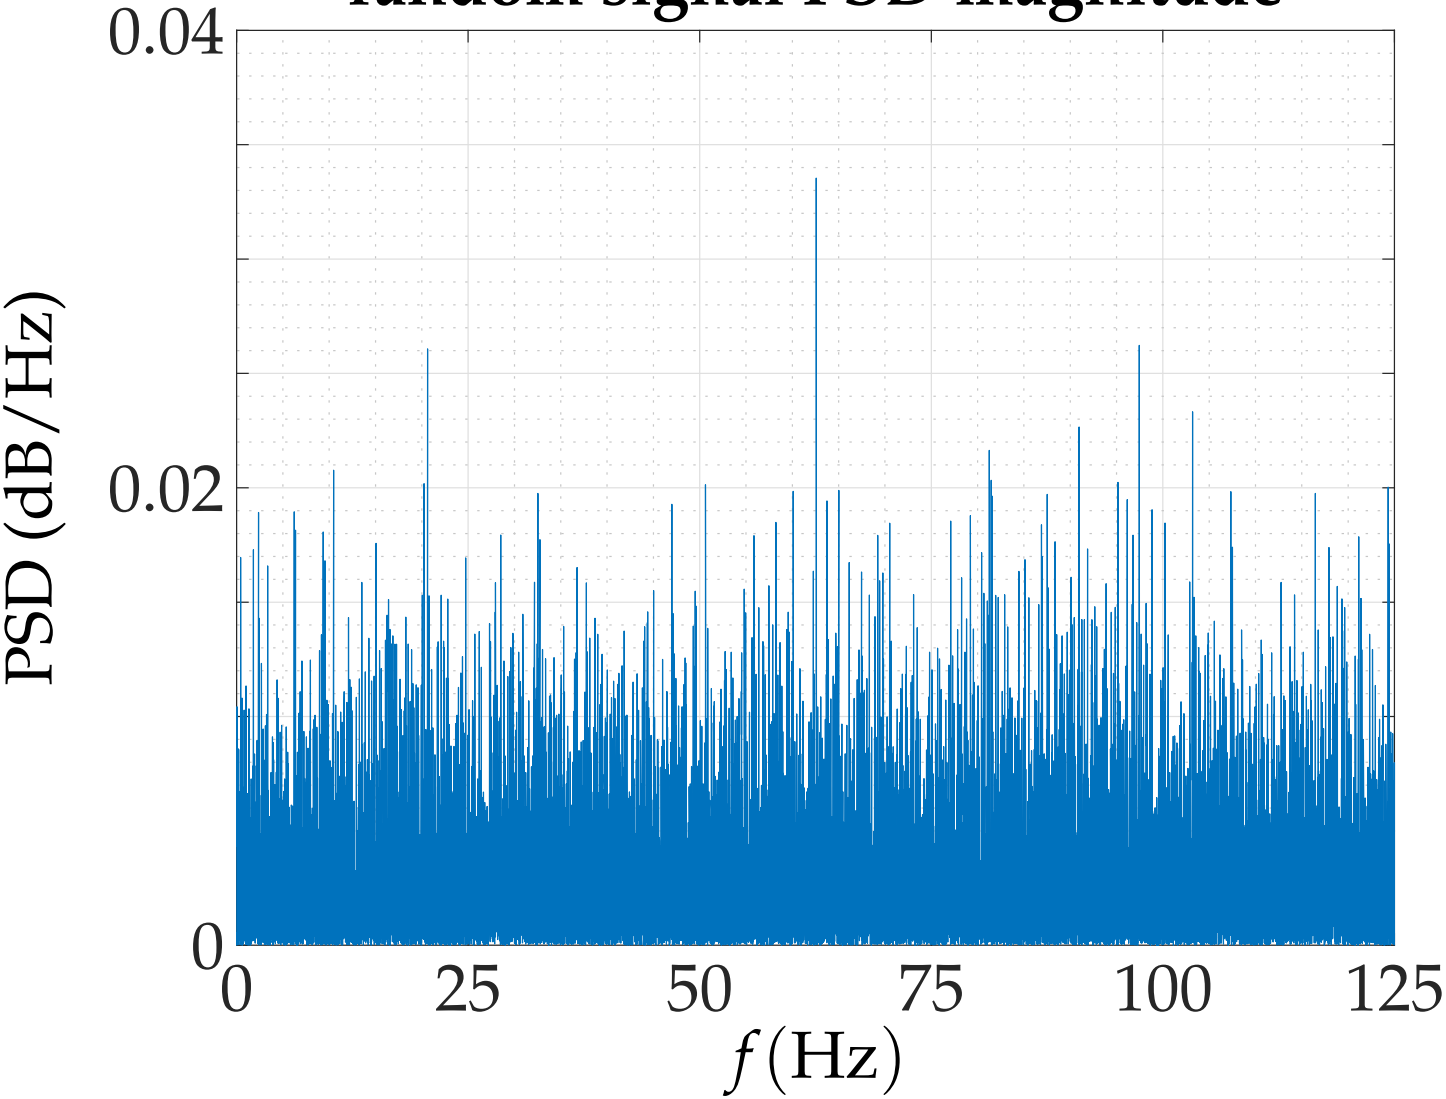

Supplement: s1 [file s1]

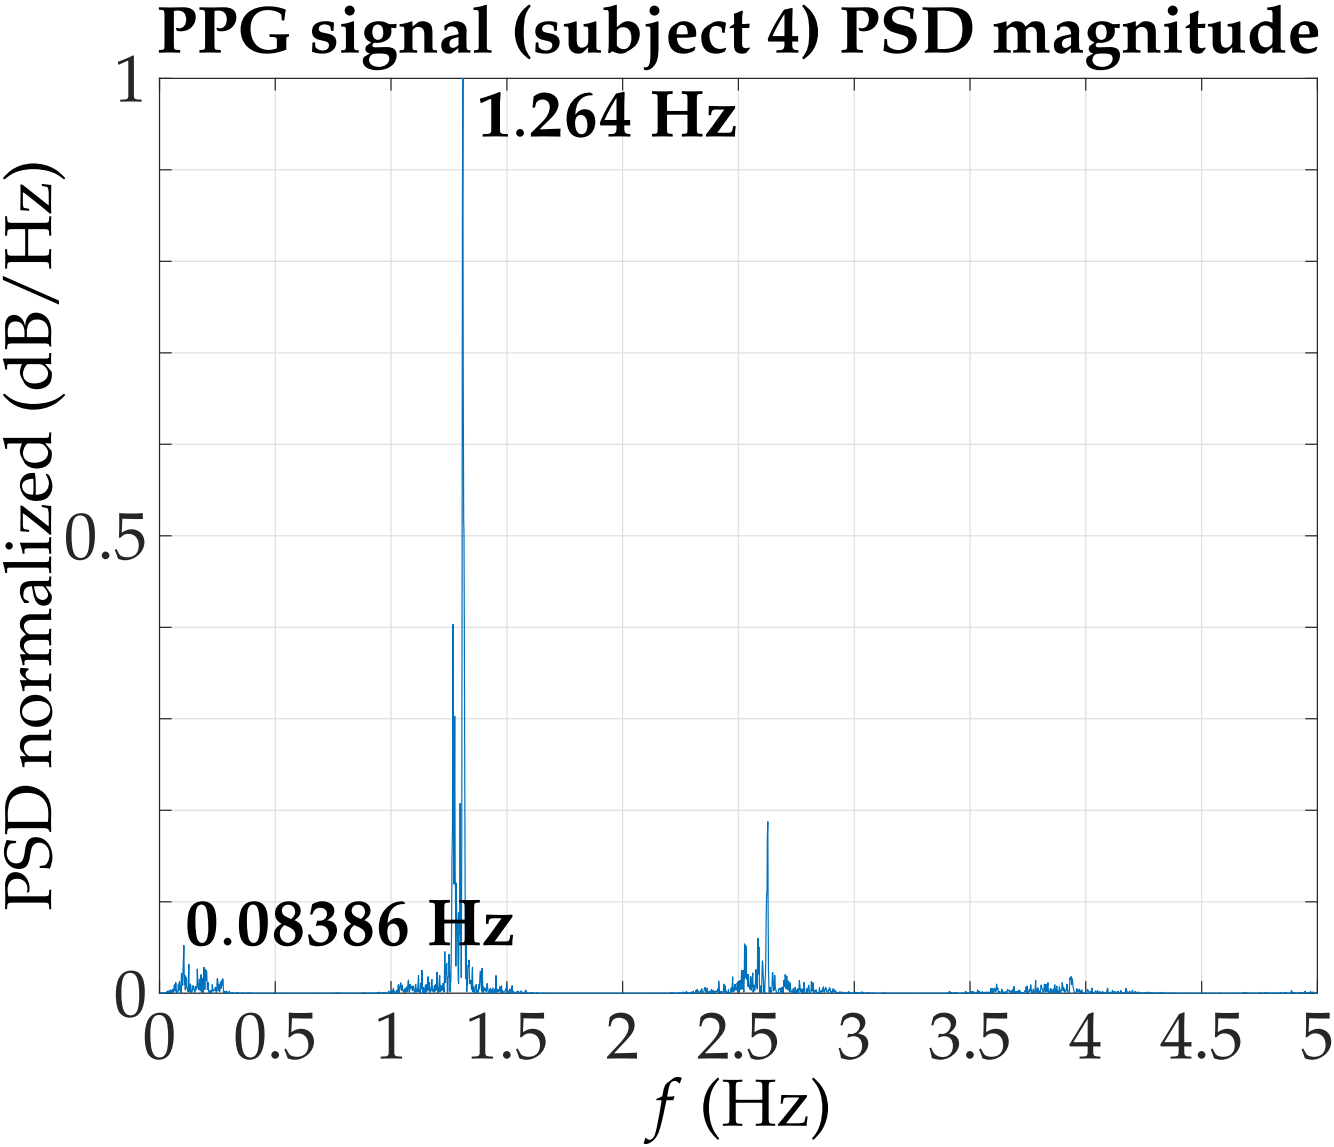

Supplement: s1 [file s1]

# PPG signal behavior subject 1

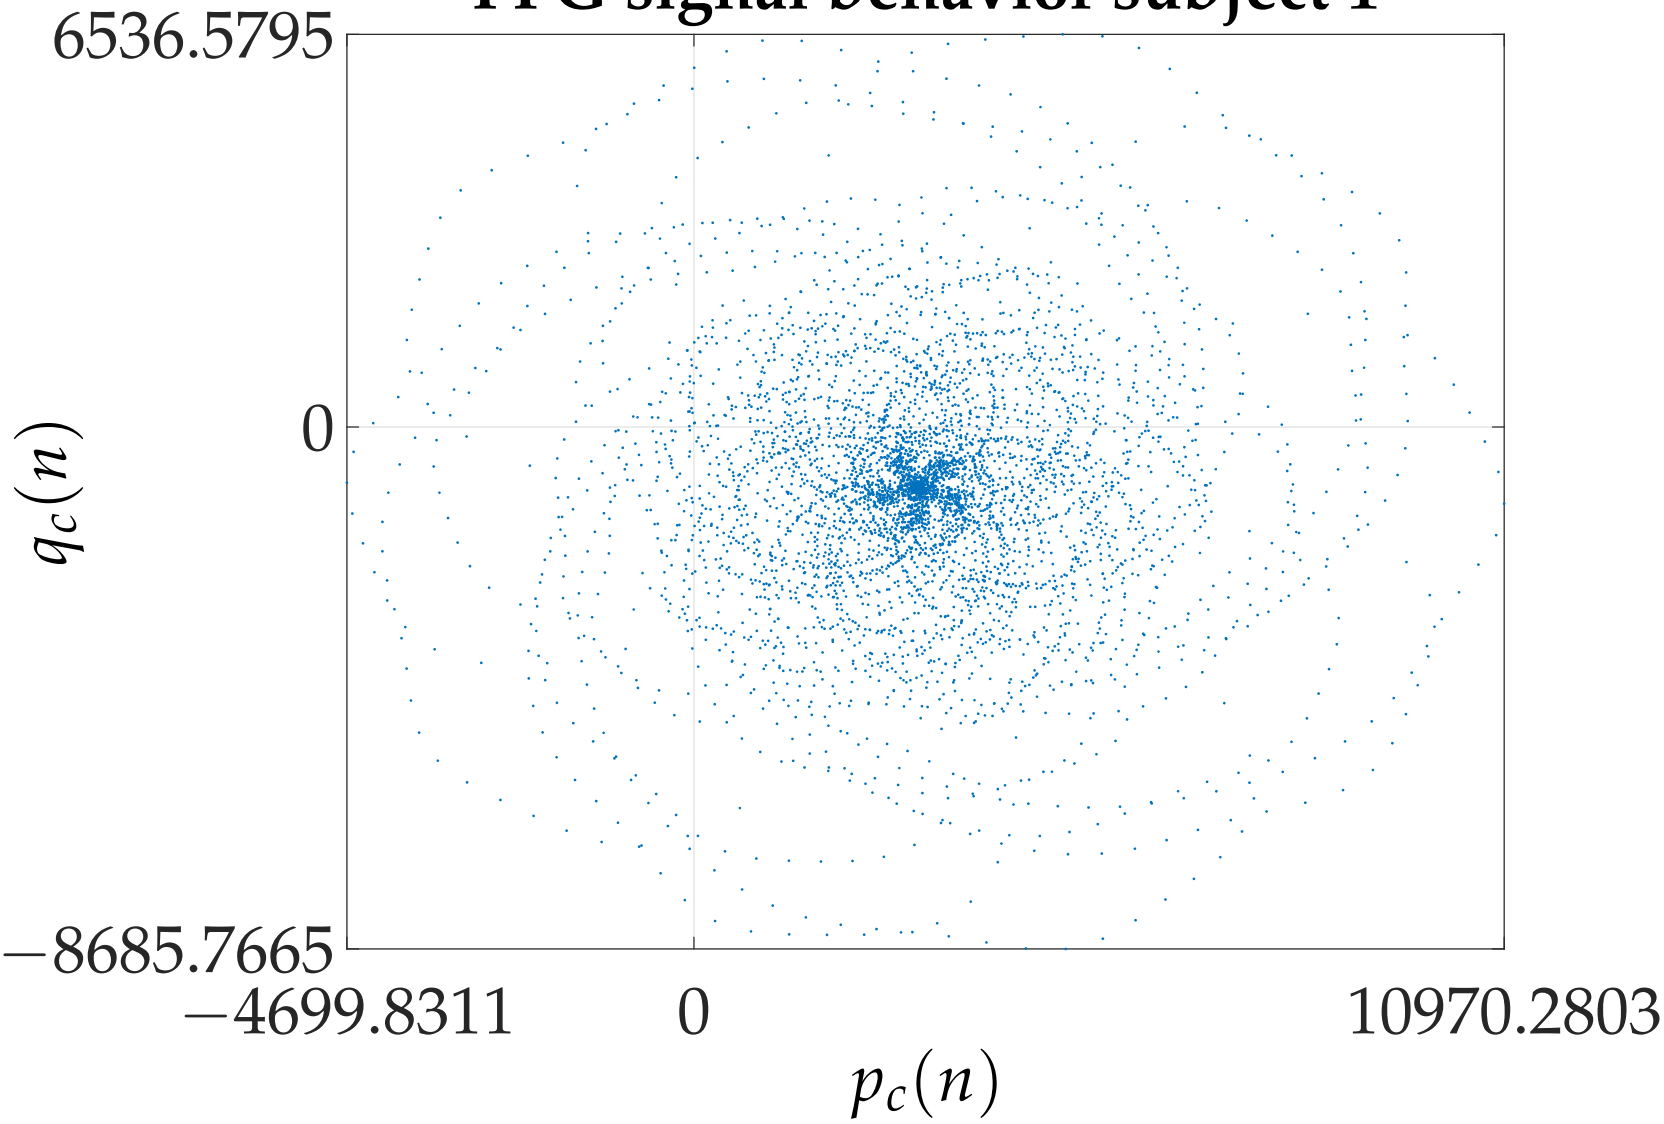

Supplement: s1 [file s1]

# chaotic signal behavior

$q_c(n)$

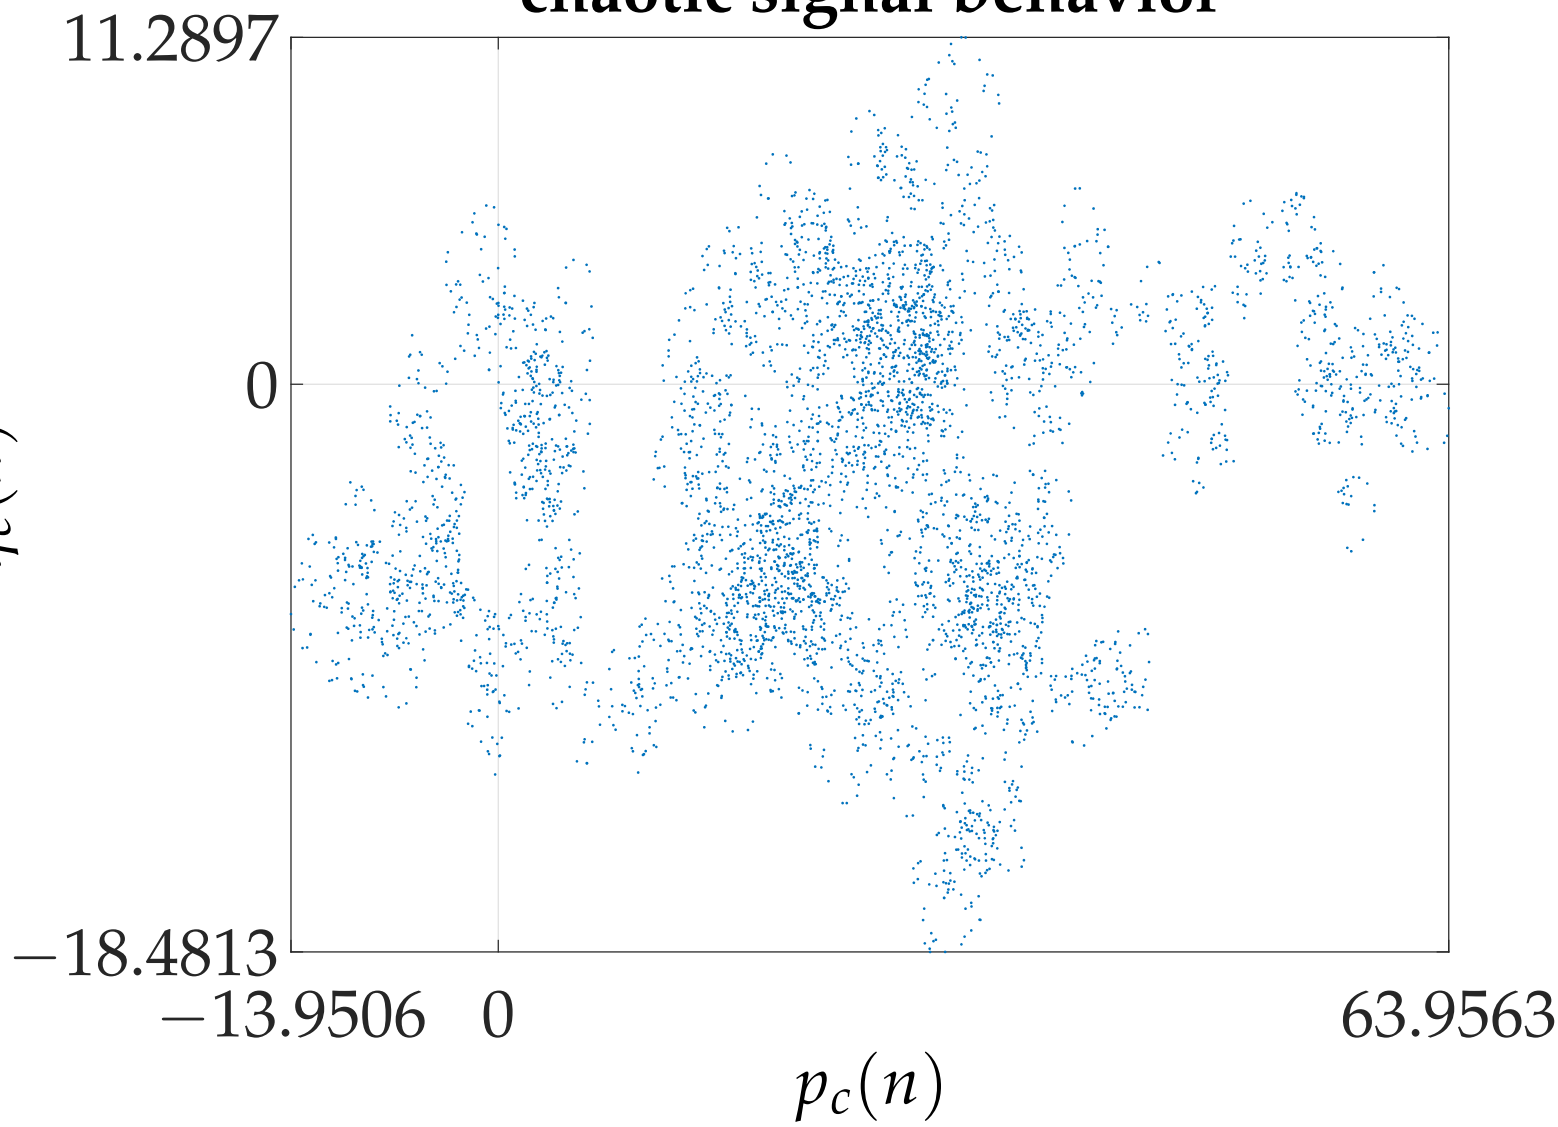

Supplement: s1 [file s1]
